# Supplementary material for: Spectroscopic Constants and Anharmonic Vibrational Frequencies of C(O)OC, c-C2O2 and Their Silicon-Containing Analogues
Source: MDPI journal article supplement (doi:10.3390/molecules28114563), 2023-06-05
Supplement: s1 [file s1]

# Supplementary Information: Spectroscopic Constants and Anharmonic Vibrational Frequencies of C(O)OC, c-C<sub>2</sub>O<sub>2</sub>, and their Silicon-containing Analogues

Olivia A. Harwick and Ryan C. Fortenberry

May 31, 2023

C(O)OC dipole moment vector [a.u.]: 0.08929742, 0.03992090, 0.00000000. C(O)OC Cartesian coordinates [Bohr/a.u.]: O 0.000000000 0.059284581 -2.736156302; C 0.000000000 -0.347609661 -0.559243623; O 0.000000000 1.208339210 1.666460193; C 0.000000000 -1.340944172 1.984145457.

c-C<sub>2</sub>O<sub>2</sub> dipole moment vector [a.u.]: 0.00000000, 0.00000000, 0.25822114. c-C<sub>2</sub>O<sub>2</sub> Cartesian coordinates [Bohr/a.u.]: C -1.770561866 0.000000000 -0.231023337; C 1.770561866 0.000000000 -0.231023337; O 0.000000000 -1.874251686 0.173432835; O 0.000000000 1.874251686 0.173432835.

Si(O)OSi dipole moment vector [a.u.]: 2.05693724, -0.50201531, 0.00000000. Si(O)OSi Cartesian coordinates [Bohr/a.u.]: O 0.000000000 -0.038679051 -4.096222913; Si 0.000000000 -0.460667397 -1.265428612; O 0.000000000 1.829763565 0.985144156; Si 0.000000000 -0.559655459 3.037709450.

Table S1: C(O)OC Force Constants with motion coupling

|                      |                   |
|----------------------|-------------------|
| F <sub>1,1,0,0</sub> | 15.023847793216   |
| F <sub>2,1,0,0</sub> | 1.118790196621    |
| F <sub>2,2,0,0</sub> | 2.796499259802    |
| F <sub>3,1,0,0</sub> | -0.096128921600   |
| F <sub>3,2,0,0</sub> | 1.427517426504    |
| F <sub>3,3,0,0</sub> | 5.871740163757    |
| F <sub>4,1,0,0</sub> | 0.949357578032    |
| F <sub>4,2,0,0</sub> | 1.120215060243    |
| F <sub>4,3,0,0</sub> | 1.662271777467    |
| F <sub>4,4,0,0</sub> | 1.656343785237    |
| F <sub>5,1,0,0</sub> | 0.040760175155    |
| F <sub>5,2,0,0</sub> | 2.531258112172    |
| F <sub>5,3,0,0</sub> | 2.891526656896    |
| F <sub>5,4,0,0</sub> | 2.124234146695    |
| F <sub>5,5,0,0</sub> | 7.385054275053    |
| F <sub>6,6,0,0</sub> | 0.267220080154    |
| F <sub>1,1,1,0</sub> | -106.029760641484 |
| F <sub>2,1,1,0</sub> | -3.040759320279   |
| F <sub>2,2,1,0</sub> | -2.128660304150   |
| F <sub>2,2,2,0</sub> | -10.882729611467  |
| F <sub>3,1,1,0</sub> | 0.031884512560    |
| F <sub>3,2,1,0</sub> | -0.312812062132   |
| F <sub>3,2,2,0</sub> | -2.144327759126   |
| F <sub>3,3,1,0</sub> | 0.472610710267    |
| F <sub>3,3,2,0</sub> | -3.589281654061   |
| F <sub>3,3,3,0</sub> | -34.382922408200  |
| F <sub>4,1,1,0</sub> | -2.784991403758   |
| F <sub>4,2,1,0</sub> | 0.390207857911    |
| F <sub>4,2,2,0</sub> | -8.170465368670   |
| F <sub>4,3,1,0</sub> | -0.548170413529   |
| F <sub>4,3,2,0</sub> | -1.432345814775   |
| F <sub>4,3,3,0</sub> | -4.373503263910   |
| F <sub>4,4,1,0</sub> | -0.550252986838   |
| F <sub>4,4,2,0</sub> | -9.292976608105   |
| F <sub>4,4,3,0</sub> | 0.074673012267    |
| F <sub>4,4,4,0</sub> | -11.938983888606  |

|                      |                  |
|----------------------|------------------|
| F <sub>5,1,1,0</sub> | -0.405995660061  |
| F <sub>5,2,1,0</sub> | -1.222927625065  |
| F <sub>5,2,2,0</sub> | -2.869772028460  |
| F <sub>5,3,1,0</sub> | 1.900335201178   |
| F <sub>5,3,2,0</sub> | -6.236264793530  |
| F <sub>5,3,3,0</sub> | -4.927692327901  |
| F <sub>5,4,1,0</sub> | -2.092722987053  |
| F <sub>5,4,2,0</sub> | -3.454855357075  |
| F <sub>5,4,3,0</sub> | -4.176315342550  |
| F <sub>5,4,4,0</sub> | -5.868797094476  |
| F <sub>5,5,1,0</sub> | -1.092262224457  |
| F <sub>5,5,2,0</sub> | -13.413277348064 |
| F <sub>5,5,3,0</sub> | -15.017969701043 |
| F <sub>5,5,4,0</sub> | -14.669145523104 |
| F <sub>5,5,5,0</sub> | -56.717523023035 |
| F <sub>6,6,1,0</sub> | -0.399076558296  |
| F <sub>6,6,2,0</sub> | -0.095405296434  |
| F <sub>6,6,3,0</sub> | -0.054881998380  |
| F <sub>6,6,4,0</sub> | -0.036655563606  |
| F <sub>6,6,5,0</sub> | -0.107957579665  |
| F <sub>1,1,1,1</sub> | 613.522956496453 |
| F <sub>2,1,1,1</sub> | 5.561914075058   |
| F <sub>2,2,1,1</sub> | 4.771374752451   |
| F <sub>2,2,2,1</sub> | 6.539270557335   |
| F <sub>2,2,2,2</sub> | 34.182255274310  |
| F <sub>3,1,1,1</sub> | 0.002955033735   |
| F <sub>3,2,1,1</sub> | 1.511356544451   |
| F <sub>3,2,2,1</sub> | 0.300599325294   |
| F <sub>3,2,2,2</sub> | 3.410306535058   |
| F <sub>3,3,1,1</sub> | -2.184111870151  |
| F <sub>3,3,2,1</sub> | -0.599518547595  |
| F <sub>3,3,2,2</sub> | 4.797882704805   |
| F <sub>3,3,3,1</sub> | 2.367717959661   |
| F <sub>3,3,3,2</sub> | 4.995458956744   |
| F <sub>3,3,3,3</sub> | 195.717236042012 |
| F <sub>4,1,1,1</sub> | 6.363841289446   |
| F <sub>4,2,1,1</sub> | 1.956807810218   |
| F <sub>4,2,2,1</sub> | -1.005186164552  |
| F <sub>4,2,2,2</sub> | 27.414577328014  |
| F <sub>4,3,1,1</sub> | 2.102787490366   |
| F <sub>4,3,2,1</sub> | 0.027466826447   |
| F <sub>4,3,2,2</sub> | 4.802448694572   |
| F <sub>4,3,3,1</sub> | -0.536845288526  |
| F <sub>4,3,3,2</sub> | 2.268647512143   |
| F <sub>4,3,3,3</sub> | 10.586538505701  |
| F <sub>4,4,1,1</sub> | 1.409145130466   |
| F <sub>4,4,2,1</sub> | -1.509524694200  |
| F <sub>4,4,2,2</sub> | 30.051858624160  |
| F <sub>4,4,3,1</sub> | 0.180591416890   |
| F <sub>4,4,3,2</sub> | 7.172461539818   |
| F <sub>4,4,3,3</sub> | -4.621059560348  |
| F <sub>4,4,4,1</sub> | 1.826298876741   |
| F <sub>4,4,4,2</sub> | 31.486339984158  |
| F <sub>4,4,4,3</sub> | 9.486273186144   |
| F <sub>4,4,4,4</sub> | 35.092661282999  |
| F <sub>5,1,1,1</sub> | 2.436673542813   |
| F <sub>5,2,1,1</sub> | -0.187560043434  |
| F <sub>5,2,2,1</sub> | 1.894897940675   |
| F <sub>5,2,2,2</sub> | -7.985955076347  |
| F <sub>5,3,1,1</sub> | -3.271570578095  |
| F <sub>5,3,2,1</sub> | 1.096057152232   |
| F <sub>5,3,2,2</sub> | 13.937938000022  |
| F <sub>5,3,3,1</sub> | -2.462590476065  |
| F <sub>5,3,3,2</sub> | 8.141363373667   |
| F <sub>5,3,3,3</sub> | -10.594231926130 |

|                      |                  |
|----------------------|------------------|
| F <sub>5,4,1,1</sub> | 3.569021759848   |
| F <sub>5,4,2,1</sub> | 2.701340545304   |
| F <sub>5,4,2,2</sub> | -9.991678016418  |
| F <sub>5,4,3,1</sub> | -1.457485702714  |
| F <sub>5,4,3,2</sub> | 15.992668443638  |
| F <sub>5,4,3,3</sub> | 4.137993602957   |
| F <sub>5,4,4,1</sub> | 6.332025629494   |
| F <sub>5,4,4,2</sub> | -10.967602978270 |
| F <sub>5,4,4,3</sub> | 17.599729340752  |
| F <sub>5,4,4,4</sub> | -9.575234092274  |
| F <sub>5,5,1,1</sub> | -0.919062029966  |
| F <sub>5,5,2,1</sub> | 3.153215271708   |
| F <sub>5,5,2,2</sub> | 3.614022850359   |
| F <sub>5,5,3,1</sub> | -4.318542503375  |
| F <sub>5,5,3,2</sub> | 39.701644808803  |
| F <sub>5,5,3,3</sub> | -15.048369649589 |
| F <sub>5,5,4,1</sub> | 5.194985560466   |
| F <sub>5,5,4,2</sub> | 5.695654812910   |
| F <sub>5,5,4,3</sub> | 39.613138594868  |
| F <sub>5,5,4,4</sub> | 7.118401095172   |
| F <sub>5,5,5,1</sub> | 9.593971117882   |
| F <sub>5,5,5,2</sub> | 78.666289061756  |
| F <sub>5,5,5,3</sub> | 61.379164136641  |
| F <sub>5,5,5,4</sub> | 88.113556058182  |
| F <sub>5,5,5,5</sub> | 379.021117134932 |
| F <sub>6,6,1,1</sub> | -0.021150691023  |
| F <sub>6,6,2,1</sub> | 0.424049817081   |
| F <sub>6,6,2,2</sub> | -0.443840908751  |
| F <sub>6,6,3,1</sub> | 0.046155239127   |
| F <sub>6,6,3,2</sub> | -0.011317929404  |
| F <sub>6,6,3,3</sub> | -0.254001562584  |
| F <sub>6,6,4,1</sub> | 0.244259013415   |
| F <sub>6,6,4,2</sub> | 0.224541646957   |
| F <sub>6,6,4,3</sub> | -0.174018596477  |
| F <sub>6,6,4,4</sub> | -0.143347172980  |
| F <sub>6,6,5,1</sub> | 0.773240151034   |
| F <sub>6,6,5,2</sub> | 0.045177504543   |
| F <sub>6,6,5,3</sub> | -0.300228695434  |
| F <sub>6,6,5,4</sub> | -0.039160362177  |
| F <sub>6,6,5,5</sub> | 0.131177887351   |
| F <sub>6,6,6,6</sub> | 0.052307194813   |

Table S2: C(O)OC Force Constants

|                      |                   |
|----------------------|-------------------|
| F <sub>1,1,0,0</sub> | 15.023846183669   |
| F <sub>2,1,0,0</sub> | 1.462403198572    |
| F <sub>2,2,0,0</sub> | 3.346629139121    |
| F <sub>3,1,0,0</sub> | -0.096129135831   |
| F <sub>3,2,0,0</sub> | 2.184811491477    |
| F <sub>3,3,0,0</sub> | 5.871737144875    |
| F <sub>4,1,0,0</sub> | 0.119807637547    |
| F <sub>4,2,0,0</sub> | 0.570080270357    |
| F <sub>4,3,0,0</sub> | -0.165996595882   |
| F <sub>4,4,0,0</sub> | 1.106201868138    |
| F <sub>5,1,0,0</sub> | 0.040760816240    |
| F <sub>5,2,0,0</sub> | 3.291930955282    |
| F <sub>5,3,0,0</sub> | 2.891529489643    |
| F <sub>5,4,0,0</sub> | 0.287809578898    |
| F <sub>5,5,0,0</sub> | 7.385053774333    |
| F <sub>6,6,0,0</sub> | 0.267217148896    |
| F <sub>1,1,1,0</sub> | -106.029782952037 |
| F <sub>2,1,1,0</sub> | -4.120034932080   |

|                      |                  |
|----------------------|------------------|
| F <sub>2,2,1,0</sub> | -0.949206748159  |
| F <sub>2,2,2,0</sub> | -26.596335774714 |
| F <sub>3,1,1,0</sub> | 0.031990003766   |
| F <sub>3,2,1,0</sub> | -0.608727826777  |
| F <sub>3,2,2,0</sub> | -2.466826308173  |
| F <sub>3,3,1,0</sub> | 0.472535932844   |
| F <sub>3,3,2,0</sub> | -5.631733619106  |
| F <sub>3,3,3,0</sub> | -34.382667989725 |
| F <sub>4,1,1,0</sub> | -0.180767225879  |
| F <sub>4,2,1,0</sub> | -0.789273017118  |
| F <sub>4,2,2,0</sub> | 0.770536588411   |
| F <sub>4,3,1,0</sub> | 0.166385703960   |
| F <sub>4,3,2,0</sub> | -1.109387097530  |
| F <sub>4,3,3,0</sub> | 0.554308429050   |
| F <sub>4,4,1,0</sub> | -1.729494571065  |
| F <sub>4,4,2,0</sub> | -1.896547266760  |
| F <sub>4,4,3,0</sub> | 0.397889712455   |
| F <sub>4,4,4,0</sub> | -0.817322973479  |
| F <sub>5,1,1,0</sub> | -0.405796203951  |
| F <sub>5,2,1,0</sub> | -2.344507321329  |
| F <sub>5,2,2,0</sub> | -7.823459453568  |
| F <sub>5,3,1,0</sub> | 1.900448665987   |
| F <sub>5,3,2,0</sub> | -7.362774796784  |
| F <sub>5,3,3,0</sub> | -4.927439788697  |
| F <sub>5,4,1,0</sub> | 0.614989923629   |
| F <sub>5,4,2,0</sub> | 1.499604210996   |
| F <sub>5,4,3,0</sub> | -1.456549080433  |
| F <sub>5,4,4,0</sub> | -0.914056069226  |
| F <sub>5,5,1,0</sub> | -1.092462954470  |
| F <sub>5,5,2,0</sub> | -19.857858771652 |
| F <sub>5,5,3,0</sub> | -15.017814832873 |
| F <sub>5,5,4,0</sub> | 0.888054020395   |
| F <sub>5,5,5,0</sub> | -56.717447396684 |
| F <sub>6,6,1,0</sub> | -0.399257019920  |
| F <sub>6,6,2,0</sub> | -0.094415409977  |
| F <sub>6,6,3,0</sub> | -0.054445669789  |
| F <sub>6,6,4,0</sub> | -0.041460859393  |
| F <sub>6,6,5,0</sub> | -0.107956935989  |
| F <sub>1,1,1,1</sub> | 613.507539873684 |
| F <sub>2,1,1,1</sub> | 8.385031475487   |
| F <sub>2,2,1,1</sub> | 5.081319986367   |
| F <sub>2,2,2,1</sub> | 0.259931091448   |
| F <sub>2,2,2,2</sub> | 121.419796645773 |
| F <sub>3,1,1,1</sub> | 0.000204326340   |
| F <sub>3,2,1,1</sub> | 2.519265703407   |
| F <sub>3,2,2,1</sub> | 0.179217069714   |
| F <sub>3,2,2,2</sub> | 17.224908003272  |
| F <sub>3,3,1,1</sub> | -2.147015749649  |
| F <sub>3,3,2,1</sub> | -0.880221388353  |
| F <sub>3,3,2,2</sub> | 2.299792148062   |
| F <sub>3,3,3,1</sub> | 2.404091840619   |
| F <sub>3,3,3,2</sub> | 11.029878183020  |
| F <sub>3,3,3,3</sub> | 195.743896331034 |
| F <sub>4,1,1,1</sub> | -0.597729253968  |
| F <sub>4,2,1,1</sub> | 1.689252858985   |
| F <sub>4,2,2,1</sub> | 1.817542747435   |
| F <sub>4,2,2,2</sub> | -2.316422701579  |
| F <sub>4,3,1,1</sub> | -0.422250980819  |
| F <sub>4,3,2,1</sub> | 0.099839732279   |
| F <sub>4,3,2,2</sub> | -2.977553910370  |
| F <sub>4,3,3,1</sub> | -0.095349720954  |
| F <sub>4,3,3,2</sub> | 4.683249928072   |
| F <sub>4,3,3,3</sub> | -3.962230636405  |
| F <sub>4,4,1,1</sub> | 1.178303928683   |
| F <sub>4,4,2,1</sub> | 3.830702590650   |

|                      |                  |
|----------------------|------------------|
| F <sub>4,4,2,2</sub> | 2.262109689917   |
| F <sub>4,4,3,1</sub> | 0.258533383505   |
| F <sub>4,4,3,2</sub> | 0.352922741329   |
| F <sub>4,4,3,3</sub> | -2.107565890317  |
| F <sub>4,4,4,1</sub> | 1.104872761414   |
| F <sub>4,4,4,2</sub> | 1.833892427494   |
| F <sub>4,4,4,3</sub> | 0.338062081774   |
| F <sub>4,4,4,4</sub> | 3.606489679342   |
| F <sub>5,1,1,1</sub> | 2.437037482165   |
| F <sub>5,2,1,1</sub> | 2.382465297311   |
| F <sub>5,2,2,1</sub> | 6.766637670852   |
| F <sub>5,2,2,2</sub> | -28.363273934773 |
| F <sub>5,3,1,1</sub> | -3.334498916731  |
| F <sub>5,3,2,1</sub> | -0.227582272348  |
| F <sub>5,3,2,2</sub> | 31.705355708811  |
| F <sub>5,3,3,1</sub> | -2.485403624803  |
| F <sub>5,3,3,2</sub> | 8.703032477840   |
| F <sub>5,3,3,3</sub> | -10.669924070152 |
| F <sub>5,4,1,1</sub> | -2.635931704665  |
| F <sub>5,4,2,1</sub> | -2.253587674494  |
| F <sub>5,4,2,2</sub> | 0.874461073297   |
| F <sub>5,4,3,1</sub> | 1.825889957403   |
| F <sub>5,4,3,2</sub> | -1.808886685769  |
| F <sub>5,4,3,3</sub> | 2.844192586912   |
| F <sub>5,4,4,1</sub> | 1.428675599104   |
| F <sub>5,4,4,2</sub> | 1.203636276260   |
| F <sub>5,4,4,3</sub> | -0.265319284055  |
| F <sub>5,4,4,4</sub> | -0.485063001588  |
| F <sub>5,5,1,1</sub> | -0.967975893798  |
| F <sub>5,5,2,1</sub> | 5.813287477986   |
| F <sub>5,5,2,2</sub> | 11.000993048872  |
| F <sub>5,5,3,1</sub> | -4.304092341692  |
| F <sub>5,5,3,2</sub> | 56.046926270403  |
| F <sub>5,5,3,3</sub> | -15.048713016114 |
| F <sub>5,5,4,1</sub> | -1.492234011241  |
| F <sub>5,5,4,2</sub> | -1.772503773778  |
| F <sub>5,5,4,3</sub> | 0.058297367442   |
| F <sub>5,5,4,4</sub> | -0.354927959975  |
| F <sub>5,5,5,1</sub> | 9.555286284065   |
| F <sub>5,5,5,2</sub> | 117.942518574570 |
| F <sub>5,5,5,3</sub> | 61.284061341174  |
| F <sub>5,5,5,4</sub> | -6.662577745709  |
| F <sub>5,5,5,5</sub> | 379.013771138610 |
| F <sub>6,6,1,1</sub> | -0.085428774122  |
| F <sub>6,6,2,1</sub> | 0.382932773053   |
| F <sub>6,6,2,2</sub> | -0.015781629336  |
| F <sub>6,6,3,1</sub> | 0.102976321184   |
| F <sub>6,6,3,2</sub> | -0.084322237703  |
| F <sub>6,6,3,3</sub> | -0.309390460471  |
| F <sub>6,6,4,1</sub> | 0.038025639424   |
| F <sub>6,6,4,2</sub> | -0.148894630905  |
| F <sub>6,6,4,3</sub> | 0.043642806670   |
| F <sub>6,6,4,4</sub> | -0.465715171818  |
| F <sub>6,6,5,1</sub> | 0.770482930980   |
| F <sub>6,6,5,2</sub> | -0.064153775112  |
| F <sub>6,6,5,3</sub> | -0.260019927203  |
| F <sub>6,6,5,4</sub> | 0.076886972207   |
| F <sub>6,6,5,5</sub> | 0.147995761765   |
| F <sub>6,6,6,6</sub> | 0.085369898213   |

Table S3: c-C<sub>2</sub>O<sub>2</sub> Force Constants

|                      |                  |
|----------------------|------------------|
| F <sub>1,1,0,0</sub> | 6.144290687282   |
| F <sub>2,1,0,0</sub> | 0.506301066671   |
| F <sub>2,2,0,0</sub> | 4.018328021919   |
| F <sub>3,1,0,0</sub> | -0.880295789094  |
| F <sub>3,2,0,0</sub> | 0.476738180662   |
| F <sub>3,3,0,0</sub> | 0.668832744253   |
| F <sub>4,4,0,0</sub> | 0.575469297143   |
| F <sub>5,5,0,0</sub> | 4.566411262153   |
| F <sub>6,6,0,0</sub> | 4.744159089462   |
| F <sub>1,1,1,0</sub> | -20.023836667994 |
| F <sub>2,1,1,0</sub> | -2.844149149854  |
| F <sub>2,2,1,0</sub> | -5.728169023618  |
| F <sub>2,2,2,0</sub> | -5.545395393502  |
| F <sub>3,1,1,0</sub> | 2.279670225683   |
| F <sub>3,2,1,0</sub> | -1.147157989024  |
| F <sub>3,2,2,0</sub> | 0.115805543964   |
| F <sub>3,3,1,0</sub> | 0.939623456961   |
| F <sub>3,3,2,0</sub> | 1.052360822168   |
| F <sub>3,3,3,0</sub> | -3.187075234020  |
| F <sub>4,4,1,0</sub> | -15.657562263342 |
| F <sub>4,4,2,0</sub> | -0.193966360119  |
| F <sub>4,4,3,0</sub> | 1.979613942702   |
| F <sub>5,5,1,0</sub> | -15.016605304680 |
| F <sub>5,5,2,0</sub> | -2.753789129591  |
| F <sub>5,5,3,0</sub> | 2.211362572890   |
| F <sub>6,5,4,0</sub> | -12.897828871186 |
| F <sub>6,6,1,0</sub> | -13.871425814986 |
| F <sub>6,6,2,0</sub> | 3.094628496373   |
| F <sub>6,6,3,0</sub> | 3.075822443602   |
| F <sub>1,1,1,1</sub> | 55.728802323570  |
| F <sub>2,1,1,1</sub> | 9.427934700668   |
| F <sub>2,2,1,1</sub> | 6.506666983001   |
| F <sub>2,2,2,1</sub> | 7.173222650401   |
| F <sub>2,2,2,2</sub> | 7.013726576884   |
| F <sub>3,1,1,1</sub> | -5.345994823154  |
| F <sub>3,2,1,1</sub> | 2.330884806010   |
| F <sub>3,2,2,1</sub> | 1.379717591864   |
| F <sub>3,2,2,2</sub> | -7.154849449354  |
| F <sub>3,3,1,1</sub> | -3.026696370397  |
| F <sub>3,3,2,1</sub> | -1.896937368771  |
| F <sub>3,3,2,2</sub> | 3.275734671131   |
| F <sub>3,3,3,1</sub> | 3.704427611122   |
| F <sub>3,3,3,2</sub> | -5.899865619615  |
| F <sub>3,3,3,3</sub> | -3.158543255830  |
| F <sub>4,4,1,1</sub> | 55.637043394567  |
| F <sub>4,4,2,1</sub> | -0.629048065487  |
| F <sub>4,4,2,2</sub> | -16.214687133303 |
| F <sub>4,4,3,1</sub> | -5.469765738116  |
| F <sub>4,4,3,2</sub> | 3.335930005115   |
| F <sub>4,4,3,3</sub> | -9.012541185509  |
| F <sub>4,4,4,4</sub> | 86.436379729573  |
| F <sub>5,5,1,1</sub> | 44.401189833975  |
| F <sub>5,5,2,1</sub> | 3.336202451819   |
| F <sub>5,5,2,2</sub> | -5.278731304746  |
| F <sub>5,5,3,1</sub> | -4.940048379166  |
| F <sub>5,5,3,2</sub> | 0.289728204883   |
| F <sub>5,5,3,3</sub> | -6.674596811052  |
| F <sub>5,5,4,4</sub> | 32.644834440927  |
| F <sub>5,5,5,5</sub> | 24.954105676999  |
| F <sub>6,5,4,1</sub> | 49.471241501957  |
| F <sub>6,5,4,2</sub> | 3.153889196585   |
| F <sub>6,5,4,3</sub> | -6.831392012890  |
| F <sub>6,6,1,1</sub> | 39.484935855710  |

|                      |                  |
|----------------------|------------------|
| F <sub>6,6,2,1</sub> | 2.082756026583   |
| F <sub>6,6,2,2</sub> | -2.512810057511  |
| F <sub>6,6,3,1</sub> | -7.209767367066  |
| F <sub>6,6,3,2</sub> | 4.649541858384   |
| F <sub>6,6,3,3</sub> | -0.023393203145  |
| F <sub>6,6,4,4</sub> | 52.294338925882  |
| F <sub>6,6,5,5</sub> | 32.702117371759  |
| F <sub>6,6,6,6</sub> | -26.046037786948 |

Table S4: Si(O)OSi Force Constants

|                      |                  |
|----------------------|------------------|
| F <sub>1,1,0,0</sub> | 8.888514564084   |
| F <sub>2,1,0,0</sub> | 0.021106719732   |
| F <sub>2,2,0,0</sub> | 3.136944072899   |
| F <sub>3,1,0,0</sub> | -0.012850770740  |
| F <sub>3,2,0,0</sub> | 1.402690323127   |
| F <sub>3,3,0,0</sub> | 4.462801171588   |
| F <sub>4,1,0,0</sub> | 0.145508301209   |
| F <sub>4,2,0,0</sub> | 0.385166358749   |
| F <sub>4,3,0,0</sub> | -0.232450095371  |
| F <sub>4,4,0,0</sub> | 0.656200219994   |
| F <sub>5,1,0,0</sub> | -0.071849575760  |
| F <sub>5,2,0,0</sub> | 1.068542462600   |
| F <sub>5,3,0,0</sub> | 1.756356561283   |
| F <sub>5,4,0,0</sub> | 0.243211050779   |
| F <sub>5,5,0,0</sub> | 3.081100969213   |
| F <sub>6,6,0,0</sub> | 0.143227893510   |
| F <sub>1,1,1,0</sub> | -52.958798328488 |
| F <sub>2,1,1,0</sub> | -0.247619356347  |
| F <sub>2,2,1,0</sub> | -0.111948955891  |
| F <sub>2,2,2,0</sub> | -22.127064757959 |
| F <sub>3,1,1,0</sub> | -0.096495884735  |
| F <sub>3,2,1,0</sub> | 0.056736702963   |
| F <sub>3,2,2,0</sub> | -0.709203140326  |
| F <sub>3,3,1,0</sub> | -0.065309157885  |
| F <sub>3,3,2,0</sub> | -2.665460753613  |
| F <sub>3,3,3,0</sub> | -24.096481051791 |
| F <sub>4,1,1,0</sub> | -0.198443178073  |
| F <sub>4,2,1,0</sub> | -0.345435711190  |
| F <sub>4,2,2,0</sub> | -0.178638182668  |
| F <sub>4,3,1,0</sub> | 0.107272106342   |
| F <sub>4,3,2,0</sub> | -0.064042126389  |
| F <sub>4,3,3,0</sub> | 0.148078284496   |
| F <sub>4,4,1,0</sub> | -0.552703963666  |
| F <sub>4,4,2,0</sub> | -0.642931949085  |
| F <sub>4,4,3,0</sub> | 0.012755736649   |
| F <sub>4,4,4,0</sub> | -0.465935265909  |
| F <sub>5,1,1,0</sub> | -0.236023391821  |
| F <sub>5,2,1,0</sub> | -0.184175010226  |
| F <sub>5,2,2,0</sub> | -3.203893654837  |
| F <sub>5,3,1,0</sub> | -0.005403523281  |
| F <sub>5,3,2,0</sub> | -2.273749360995  |
| F <sub>5,3,3,0</sub> | -3.225756451132  |
| F <sub>5,4,1,0</sub> | -0.006522679160  |
| F <sub>5,4,2,0</sub> | 0.308336948715   |
| F <sub>5,4,3,0</sub> | -0.184221595260  |
| F <sub>5,4,4,0</sub> | -0.273430060252  |
| F <sub>5,5,1,0</sub> | -0.147288283792  |
| F <sub>5,5,2,0</sub> | -6.507325029478  |
| F <sub>5,5,3,0</sub> | -6.204083354151  |
| F <sub>5,5,4,0</sub> | 0.098669034551   |
| F <sub>5,5,5,0</sub> | -19.265993818618 |

|                      |                  |
|----------------------|------------------|
| F <sub>6,6,1,0</sub> | -0.103772458379  |
| F <sub>6,6,2,0</sub> | -0.086549800465  |
| F <sub>6,6,3,0</sub> | 0.023711382110   |
| F <sub>6,6,4,0</sub> | 0.026507654303   |
| F <sub>6,6,5,0</sub> | -0.101249858502  |
| F <sub>1,1,1,1</sub> | 264.601953836922 |
| F <sub>2,1,1,1</sub> | 0.079362395183   |
| F <sub>2,2,1,1</sub> | 1.103024856515   |
| F <sub>2,2,2,1</sub> | 0.845021492167   |
| F <sub>2,2,2,2</sub> | 100.638379135728 |
| F <sub>3,1,1,1</sub> | 0.473976546064   |
| F <sub>3,2,1,1</sub> | -0.248137044302  |
| F <sub>3,2,2,1</sub> | 0.053357958664   |
| F <sub>3,2,2,2</sub> | 2.452282552170   |
| F <sub>3,3,1,1</sub> | -0.040561261106  |
| F <sub>3,3,2,1</sub> | 0.101127124530   |
| F <sub>3,3,2,2</sub> | 2.934531630770   |
| F <sub>3,3,3,1</sub> | 0.102596240001   |
| F <sub>3,3,3,2</sub> | 2.273719749051   |
| F <sub>3,3,3,3</sub> | 118.340743232783 |
| F <sub>4,1,1,1</sub> | 0.082112999623   |
| F <sub>4,2,1,1</sub> | 0.087874742588   |
| F <sub>4,2,2,1</sub> | -0.164577574213  |
| F <sub>4,2,2,2</sub> | -1.032062336582  |
| F <sub>4,3,1,1</sub> | 0.427026121723   |
| F <sub>4,3,2,1</sub> | -0.047957953128  |
| F <sub>4,3,2,2</sub> | 1.224193822113   |
| F <sub>4,3,3,1</sub> | 0.246472099542   |
| F <sub>4,3,3,2</sub> | 0.313034900015   |
| F <sub>4,3,3,3</sub> | 0.592127294660   |
| F <sub>4,4,1,1</sub> | -0.198602058884  |
| F <sub>4,4,2,1</sub> | 1.025665984387   |
| F <sub>4,4,2,2</sub> | 0.485930828684   |
| F <sub>4,4,3,1</sub> | 0.241056009558   |
| F <sub>4,4,3,2</sub> | -0.044679071412  |
| F <sub>4,4,3,3</sub> | -0.325226157074  |
| F <sub>4,4,4,1</sub> | 0.925869604913   |
| F <sub>4,4,4,2</sub> | 0.756977705769   |
| F <sub>4,4,4,3</sub> | 0.088739428000   |
| F <sub>4,4,4,4</sub> | 1.755642429848   |
| F <sub>5,1,1,1</sub> | -0.073754015832  |
| F <sub>5,2,1,1</sub> | -0.041416507778  |
| F <sub>5,2,2,1</sub> | 0.180417812532   |
| F <sub>5,2,2,2</sub> | -3.225520809532  |
| F <sub>5,3,1,1</sub> | -0.648970172350  |
| F <sub>5,3,2,1</sub> | 0.424209867294   |
| F <sub>5,3,2,2</sub> | 7.672460819687   |
| F <sub>5,3,3,1</sub> | 1.106248460593   |
| F <sub>5,3,3,2</sub> | 5.707013941756   |
| F <sub>5,3,3,3</sub> | -1.142313592839  |
| F <sub>5,4,1,1</sub> | -0.874559145028  |
| F <sub>5,4,2,1</sub> | -0.517073903227  |
| F <sub>5,4,2,2</sub> | -1.174772682606  |
| F <sub>5,4,3,1</sub> | 0.727216918991   |
| F <sub>5,4,3,2</sub> | 0.342245380799   |
| F <sub>5,4,3,3</sub> | -1.620830065777  |
| F <sub>5,4,4,1</sub> | 0.621049644828   |
| F <sub>5,4,4,2</sub> | -0.108073215219  |
| F <sub>5,4,4,3</sub> | -0.503126334840  |
| F <sub>5,4,4,4</sub> | -0.281848571252  |
| F <sub>5,5,1,1</sub> | -0.292849361611  |
| F <sub>5,5,2,1</sub> | 0.268027250608   |
| F <sub>5,5,2,2</sub> | 4.320894753533   |
| F <sub>5,5,3,1</sub> | 0.635699879398   |
| F <sub>5,5,3,2</sub> | 15.337453981708  |



|                      |                  |
|----------------------|------------------|
| F <sub>5,5,3,3</sub> | 3.221179169317   |
| F <sub>5,5,4,1</sub> | -0.173361803029  |
| F <sub>5,5,4,2</sub> | -0.537225653417  |
| F <sub>5,5,4,3</sub> | -0.520635891935  |
| F <sub>5,5,4,4</sub> | -0.340403004419  |
| F <sub>5,5,5,1</sub> | 1.970657382656   |
| F <sub>5,5,5,2</sub> | 29.279126747182  |
| F <sub>5,5,5,3</sub> | 27.327572854401  |
| F <sub>5,5,5,4</sub> | -2.692939254157  |
| F <sub>5,5,5,5</sub> | 101.348402507844 |
| F <sub>6,6,1,1</sub> | -0.350253563832  |
| F <sub>6,6,2,1</sub> | -0.310737974495  |
| F <sub>6,6,2,2</sub> | 0.343270084455   |
| F <sub>6,6,3,1</sub> | 0.616817861349   |
| F <sub>6,6,3,2</sub> | -0.150953541866  |
| F <sub>6,6,3,3</sub> | 0.194021213085   |
| F <sub>6,6,4,1</sub> | 0.287620644211   |
| F <sub>6,6,4,2</sub> | -0.022844990567  |
| F <sub>6,6,4,3</sub> | 0.152225112967   |
| F <sub>6,6,4,4</sub> | 0.200051278870   |
| F <sub>6,6,5,1</sub> | -1.220337284670  |
| F <sub>6,6,5,2</sub> | -1.166868535941  |
| F <sub>6,6,5,3</sub> | -0.570039395345  |
| F <sub>6,6,5,4</sub> | 0.912009436852   |
| F <sub>6,6,5,5</sub> | -0.361593245021  |
| F <sub>6,6,6,6</sub> | -0.075363012381  |

Table S5: c-Si<sub>2</sub>O<sub>2</sub> Force Constants

|                      |                  |
|----------------------|------------------|
| F <sub>1,1,0,0</sub> | 4.350447425724   |
| F <sub>2,1,0,0</sub> | -0.198394300695  |
| F <sub>2,2,0,0</sub> | 2.094913742715   |
| F <sub>3,3,0,0</sub> | 1.980375422923   |
| F <sub>4,4,0,0</sub> | 0.229997430540   |
| F <sub>5,5,0,0</sub> | 3.867805374562   |
| F <sub>6,6,0,0</sub> | 3.942531087669   |
| F <sub>1,1,1,0</sub> | -11.516337862792 |
| F <sub>2,1,1,0</sub> | 0.022022813881   |
| F <sub>2,2,1,0</sub> | -2.118226963454  |
| F <sub>2,2,2,0</sub> | -0.353687366606  |
| F <sub>3,3,1,0</sub> | -11.262445549545 |
| F <sub>3,3,2,0</sub> | 0.535829518041   |
| F <sub>4,4,1,0</sub> | 1.380036809300   |
| F <sub>4,4,2,0</sub> | -0.056911778451  |
| F <sub>5,5,1,0</sub> | -9.387241116609  |
| F <sub>5,5,2,0</sub> | -0.471549024622  |
| F <sub>6,5,3,0</sub> | -10.033974099665 |
| F <sub>6,6,1,0</sub> | -9.555603417617  |
| F <sub>6,6,2,0</sub> | 1.476471147455   |
| F <sub>1,1,1,1</sub> | 27.416231792620  |
| F <sub>2,1,1,1</sub> | 0.595765779548   |
| F <sub>2,2,1,1</sub> | 2.730152728978   |
| F <sub>2,2,2,1</sub> | -0.162636628443  |
| F <sub>2,2,2,2</sub> | 6.097071492116   |
| F <sub>3,3,1,1</sub> | 31.544731709657  |
| F <sub>3,3,2,1</sub> | -1.267316337003  |
| F <sub>3,3,2,2</sub> | -4.853526668049  |
| F <sub>3,3,3,3</sub> | 45.602872874892  |
| F <sub>4,4,1,1</sub> | -2.607541355869  |
| F <sub>4,4,2,1</sub> | 1.002402650758   |
| F <sub>4,4,2,2</sub> | 0.257414252749   |
| F <sub>4,4,3,3</sub> | -4.727328226602  |

|                      |                 |
|----------------------|-----------------|
| F <sub>4,4,4,4</sub> | 3.445543503331  |
| F <sub>5,5,1,1</sub> | 22.172039623577 |
| F <sub>5,5,2,1</sub> | -0.310337240139 |
| F <sub>5,5,2,2</sub> | -3.208508023587 |
| F <sub>5,5,3,3</sub> | 26.024552991015 |
| F <sub>5,5,4,4</sub> | -3.708162334288 |
| F <sub>5,5,5,5</sub> | 7.688744310625  |
| F <sub>6,5,3,1</sub> | 27.912398969239 |
| F <sub>6,5,3,2</sub> | -0.749887948318 |
| F <sub>6,5,4,3</sub> | 0.325242098515  |
| F <sub>6,6,1,1</sub> | 22.627498598712 |
| F <sub>6,6,2,1</sub> | -0.133764787208 |
| F <sub>6,6,2,2</sub> | -2.043271386450 |
| F <sub>6,6,3,3</sub> | 28.279171170424 |
| F <sub>6,6,4,4</sub> | -3.892859893945 |
| F <sub>6,6,5,5</sub> | 19.898142848520 |
| F <sub>6,6,6,6</sub> | 9.724222396484  |

Table S6: C(O)OC Frequencies and ZPVE with motion coupling

|                          | Description                                                                                      | Frequencies [cm <sup>-1</sup> ] |
|--------------------------|--------------------------------------------------------------------------------------------------|---------------------------------|
| $\omega_1$               | O <sub>1</sub> –C <sub>1</sub> stretch                                                           | 2030.4                          |
| $\omega_2$               | O <sub>2</sub> –C <sub>2</sub> stretch                                                           | 1236.1                          |
| $\omega_3$               | C <sub>1</sub> –O <sub>2</sub> –C <sub>2</sub> bend                                              | 947.4                           |
| $\omega_4$               | (C <sub>1</sub> –O <sub>2</sub> stretch) + (O <sub>1</sub> –C <sub>1</sub> –O <sub>2</sub> bend) | 518.1                           |
| $\omega_5$               | out-of-plane bend                                                                                | 508.2                           |
| $\omega_6$               | (C <sub>1</sub> –O <sub>2</sub> stretch) - (O <sub>1</sub> –C <sub>1</sub> –O <sub>2</sub> bend) | 478.3                           |
| $\nu_1$                  | O <sub>1</sub> –C <sub>1</sub> stretch                                                           | 2006.9                          |
| $\nu_2$                  | O <sub>2</sub> –C <sub>2</sub> stretch                                                           | 1248.9                          |
| $\nu_3$                  | C <sub>1</sub> –O <sub>2</sub> –C <sub>2</sub> bend                                              | 919.6                           |
| $\nu_4$                  | (C <sub>1</sub> –O <sub>2</sub> stretch) + (O <sub>1</sub> –C <sub>1</sub> –O <sub>2</sub> bend) | 454.2                           |
| $\nu_5$                  | out-of-plane bend                                                                                | 492.4                           |
| $\nu_6$                  | (C <sub>1</sub> –O <sub>2</sub> stretch) - (O <sub>1</sub> –C <sub>1</sub> –O <sub>2</sub> bend) | 310.6                           |
| ZPVE [cm <sup>-1</sup> ] |                                                                                                  | 2808.9                          |

Table S7: C(O)OC Rotational Constants [MHz] with motion coupling

|          |          |
|----------|----------|
| $A_e$    | 38841.1  |
| $B_e$    | 8384.9   |
| $C_e$    | 6896.1   |
| $A_0$    | 38826.2  |
| $B_0$    | 8274.5   |
| $C_0$    | 6807.3   |
| $\kappa$ | -0.90835 |
| $A_1$    | 38818.2  |
| $B_1$    | 8232.2   |
| $C_1$    | 6778.5   |
| $A_2$    | 38374.6  |
| $B_2$    | 8298.3   |
| $C_2$    | 6811.8   |
| $A_3$    | 38967.6  |
| $B_3$    | 8252.8   |
| $C_3$    | 6792.9   |
| $A_4$    | 40153.9  |
| $B_4$    | 8217.8   |
| $C_4$    | 6755.1   |
| $A_5$    | 42481.4  |
| $B_5$    | 8278.3   |
| $C_5$    | 6818.7   |
| $A_6$    | 34131.2  |
| $B_6$    | 8147.1   |
| $C_6$    | 6709.0   |

Table S8: C(O)OC Quartic and Sextic Distortion Constants with motion coupling

| Constant      | Units |          |
|---------------|-------|----------|
| $\Delta_J$    | kHz   | 3.456    |
| $\Delta_K$    | kHz   | 151.182  |
| $\Delta_{JK}$ | kHz   | 51.193   |
| $\delta_J$    | Hz    | 682.262  |
| $\delta_K$    | kHz   | 36.183   |
| $\Phi_J$      | mHz   | -11.976  |
| $\Phi_K$      | Hz    | -2.507   |
| $\Phi_{JK}$   | mHz   | -344.913 |
| $\Phi_{KJ}$   | Hz    | 2.500    |
| $\phi_j$      | mHz   | -3.170   |
| $\phi_{jk}$   | mHz   | -257.387 |
| $\phi_k$      | Hz    | 3.710    |

Table S9: C(O)OC Geometry [ $\text{\AA}$  or Deg] with motion coupling

| Coordinate                                 | $r_e$       | $r_0$       |
|--------------------------------------------|-------------|-------------|
| $r(\text{O}_1-\text{C}_2)$                 | 1.1717212   | 1.1703507   |
| $r(\text{C}_2-\text{O}_3)$                 | 1.4387036   | 1.4719814   |
| $r(\text{O}_3-\text{C}_4)$                 | 1.3594921   | 1.3566819   |
| $\angle(\text{C}_2-\text{O}_1-\text{O}_3)$ | 134.4045544 | 133.3263362 |
| $\angle(\text{O}_3-\text{C}_2-\text{C}_4)$ | 62.0919164  | 61.6193430  |

Table S10: C(O)OC Fermi Resonances with motion coupling

|                                                    |
|----------------------------------------------------|
| $2\nu_3 = \nu_3 + \nu_2 = \nu_1$                   |
| $\nu_6 + \nu_3 = \nu_2$                            |
| $2\nu_4 = 2\nu_5 = 2\nu_6 = \nu_6 + \nu_4 = \nu_3$ |

Table S11: C(O)OC Geometry [ $\text{\AA}$  or Deg]

| Coordinate                                 | $r_e$       | $r_0$       |
|--------------------------------------------|-------------|-------------|
| $r(\text{O}_1-\text{C}_2)$                 | 1.1717212   | 1.1703483   |
| $r(\text{C}_2-\text{O}_3)$                 | 1.4387035   | 1.4720071   |
| $r(\text{O}_3-\text{C}_4)$                 | 1.3594921   | 1.3566750   |
| $\angle(\text{C}_2-\text{O}_1-\text{O}_3)$ | 134.4045563 | 133.3254266 |
| $\angle(\text{O}_3-\text{C}_2-\text{C}_4)$ | 62.0919179  | 61.6188493  |

Table S12: C(O)OC Fermi Resonances

|                                                    |
|----------------------------------------------------|
| $2\nu_3 = \nu_3 + \nu_2 = \nu_1$                   |
| $\nu_6 + \nu_3 = \nu_2$                            |
| $2\nu_4 = 2\nu_5 = 2\nu_6 = \nu_6 + \nu_4 = \nu_3$ |

Table S13:  $^{12}\text{C}(^{16}\text{O})^{16}\text{O}^{13}\text{C}$  Frequencies and ZPVE

|                           | Description                                                                                 | Frequencies [ $\text{cm}^{-1}$ ] |
|---------------------------|---------------------------------------------------------------------------------------------|----------------------------------|
| $\omega_1$                | $\text{O}_1-\text{C}_1$ stretch                                                             | 2027.5                           |
| $\omega_2$                | $\text{O}_2-\text{C}_2$ stretch                                                             | 1210.9                           |
| $\omega_3$                | $\text{C}_1-\text{O}_2-\text{C}_2$ bend                                                     | 933.2                            |
| $\omega_4$                | $(\text{C}_1-\text{O}_2 \text{ stretch}) + (\text{O}_1-\text{C}_1-\text{O}_2 \text{ bend})$ | 514.8                            |
| $\omega_5$                | out-of-plane bend                                                                           | 506.2                            |
| $\omega_6$                | $(\text{C}_1-\text{O}_2 \text{ stretch}) - (\text{O}_1-\text{C}_1-\text{O}_2 \text{ bend})$ | 474.4                            |
| $\nu_1$                   | $\text{O}_1-\text{C}_1$ stretch                                                             | 2004.0                           |
| $\nu_2$                   | $\text{O}_2-\text{C}_2$ stretch                                                             | 1225.7                           |
| $\nu_3$                   | $\text{C}_1-\text{O}_2-\text{C}_2$ bend                                                     | 906.4                            |
| $\nu_4$                   | $(\text{C}_1-\text{O}_2 \text{ stretch}) + (\text{O}_1-\text{C}_1-\text{O}_2 \text{ bend})$ | 445.9                            |
| $\nu_5$                   | out-of-plane bend                                                                           | 490.9                            |
| $\nu_6$                   | $(\text{C}_1-\text{O}_2 \text{ stretch}) - (\text{O}_1-\text{C}_1-\text{O}_2 \text{ bend})$ | 313.7                            |
| ZPVE [ $\text{cm}^{-1}$ ] |                                                                                             | 2782.8                           |

Table S14:  $^{12}\text{C}(^{16}\text{O})^{16}\text{O}^{13}\text{C}$  Rotational Constants [MHz]

|          |          |
|----------|----------|
| $A_e$    | 37443.5  |
| $B_e$    | 8235.0   |
| $C_e$    | 6750.4   |
| $A_0$    | 37442.9  |
| $B_0$    | 8128.7   |
| $C_0$    | 6665.5   |
| $\kappa$ | -0.90492 |
| $A_1$    | 37439.2  |
| $B_1$    | 8086.0   |
| $C_1$    | 6636.8   |
| $A_2$    | 37008.8  |
| $B_2$    | 8150.8   |
| $C_2$    | 6668.6   |
| $A_3$    | 37596.4  |
| $B_3$    | 8105.5   |
| $C_3$    | 6651.3   |
| $A_4$    | 38546.0  |
| $B_4$    | 8070.3   |
| $C_4$    | 6614.0   |
| $A_5$    | 40767.8  |
| $B_5$    | 8132.8   |
| $C_5$    | 6676.7   |
| $A_6$    | 33298.6  |
| $B_6$    | 8013.9   |
| $C_6$    | 6575.6   |

Table S15:  $^{12}\text{C}(^{16}\text{O})^{16}\text{O}^{13}\text{C}$  Quartic and Sextic Distortion Constants

| Constant      | Units |          |
|---------------|-------|----------|
| $\Delta_J$    | kHz   | 3.220    |
| $\Delta_K$    | kHz   | 142.886  |
| $\Delta_{JK}$ | kHz   | 49.644   |
| $\delta_J$    | Hz    | 645.073  |
| $\delta_K$    | kHz   | 34.593   |
| $\Phi_J$      | mHz   | -10.040  |
| $\Phi_K$      | Hz    | -2.308   |
| $\Phi_{JK}$   | mHz   | -328.667 |
| $\Phi_{KJ}$   | Hz    | 2.355    |
| $\phi_j$      | mHz   | -2.688   |
| $\phi_{jk}$   | mHz   | -235.391 |
| $\phi_k$      | Hz    | 3.452    |

Table S16:  $^{12}\text{C}(^{16}\text{O})^{16}\text{O}^{13}\text{C}$  Geometry [ $\text{\AA}$  or Deg]

| Coordinate                                 | $r_e$       | $r_0$       |
|--------------------------------------------|-------------|-------------|
| $r(\text{O}_1-\text{C}_2)$                 | 1.1717212   | 1.1703046   |
| $r(\text{C}_2-\text{O}_3)$                 | 1.4387035   | 1.4720723   |
| $r(\text{O}_3-\text{C}_4)$                 | 1.3594921   | 1.3565218   |
| $\angle(\text{C}_2-\text{O}_1-\text{O}_3)$ | 134.4045563 | 133.3281560 |
| $\angle(\text{O}_3-\text{C}_2-\text{C}_4)$ | 62.0919179  | 61.6165354  |

Table S17:  $^{12}\text{C}(^{16}\text{O})^{16}\text{O}^{13}\text{C}$  Fermi Resonances

|                                                    |
|----------------------------------------------------|
| $2\nu_3 = \nu_3 + \nu_2 = \nu_1$                   |
| $2\nu_5 = \nu_6 + \nu_3 = \nu_2$                   |
| $2\nu_4 = 2\nu_5 = 2\nu_6 = \nu_6 + \nu_4 = \nu_3$ |

Table S18:  $^{12}\text{C}(^{16}\text{O})^{18}\text{O}^{12}\text{C}$  Frequencies and ZPVE

|                           | Description                                                                                 | Frequencies [ $\text{cm}^{-1}$ ] |
|---------------------------|---------------------------------------------------------------------------------------------|----------------------------------|
| $\omega_1$                | $\text{O}_1-\text{C}_1$ stretch                                                             | 2030.4                           |
| $\omega_2$                | $\text{O}_2-\text{C}_2$ stretch                                                             | 1209.8                           |
| $\omega_3$                | $\text{C}_1-\text{O}_2-\text{C}_2$ bend                                                     | 939.4                            |
| $\omega_4$                | $(\text{C}_1-\text{O}_2 \text{ stretch}) + (\text{O}_1-\text{C}_1-\text{O}_2 \text{ bend})$ | 508.0                            |
| $\omega_5$                | out-of-plane bend                                                                           | 501.9                            |
| $\omega_6$                | $(\text{C}_1-\text{O}_2 \text{ stretch}) - (\text{O}_1-\text{C}_1-\text{O}_2 \text{ bend})$ | 475.6                            |
| $\nu_1$                   | $\text{O}_1-\text{C}_1$ stretch                                                             | 2006.1                           |
| $\nu_2$                   | $\text{O}_2-\text{C}_2$ stretch                                                             | 1208.6                           |
| $\nu_3$                   | $\text{C}_1-\text{O}_2-\text{C}_2$ bend                                                     | 910.8                            |
| $\nu_4$                   | $(\text{C}_1-\text{O}_2 \text{ stretch}) + (\text{O}_1-\text{C}_1-\text{O}_2 \text{ bend})$ | 493.0                            |
| $\nu_5$                   | out-of-plane bend                                                                           | 468.7                            |
| $\nu_6$                   | $(\text{C}_1-\text{O}_2 \text{ stretch}) - (\text{O}_1-\text{C}_1-\text{O}_2 \text{ bend})$ | 285.7                            |
| ZPVE [ $\text{cm}^{-1}$ ] |                                                                                             | 2783.6                           |

Table S19:  $^{12}\text{C}(^{16}\text{O})^{18}\text{O}^{12}\text{C}$  Rotational Constants [MHz]

|          |          |
|----------|----------|
| $A_e$    | 36682.3  |
| $B_e$    | 8176.8   |
| $C_e$    | 6686.3   |
| $A_0$    | 36681.0  |
| $B_0$    | 8067.0   |
| $C_0$    | 6599.6   |
| $\kappa$ | -0.90244 |
| $A_1$    | 36665.2  |
| $B_1$    | 8027.7   |
| $C_1$    | 6573.0   |
| $A_2$    | 36277.6  |
| $B_2$    | 8088.7   |
| $C_2$    | 6603.6   |
| $A_3$    | 36792.9  |
| $B_3$    | 8049.0   |
| $C_3$    | 6586.6   |
| $A_4$    | 39952.8  |
| $B_4$    | 8084.7   |
| $C_4$    | 6610.3   |
| $A_5$    | 36895.2  |
| $B_5$    | 8026.0   |
| $C_5$    | 6573.3   |
| $A_6$    | 33499.7  |
| $B_6$    | 7906.2   |
| $C_6$    | 6477.7   |

Table S20:  $^{12}\text{C}(^{16}\text{O})^{18}\text{O}^{12}\text{C}$  Quartic and Sextic Distortion Constants

| Constant      | Units |          |
|---------------|-------|----------|
| $\Delta_J$    | kHz   | 3.468    |
| $\Delta_K$    | kHz   | 131.734  |
| $\Delta_{JK}$ | kHz   | 46.461   |
| $\delta_J$    | Hz    | 705.886  |
| $\delta_K$    | kHz   | 33.896   |
| $\Phi_J$      | mHz   | -13.394  |
| $\Phi_K$      | Hz    | -2.343   |
| $\Phi_{JK}$   | mHz   | -295.573 |
| $\Phi_{KJ}$   | Hz    | 2.281    |
| $\phi_j$      | mHz   | -3.732   |
| $\phi_{jk}$   | mHz   | -246.490 |
| $\phi_k$      | Hz    | 3.228    |

Table S21:  $^{12}\text{C}(^{16}\text{O})^{18}\text{O}^{12}\text{C}$  Geometry [ $\text{\AA}$  or Deg]

| Coordinate                                 | $r_e$       | $r_0$       |
|--------------------------------------------|-------------|-------------|
| $r(\text{O}_1-\text{C}_2)$                 | 1.1717212   | 1.1704133   |
| $r(\text{C}_2-\text{O}_3)$                 | 1.4387035   | 1.4712782   |
| $r(\text{O}_3-\text{C}_4)$                 | 1.3594921   | 1.3567044   |
| $\angle(\text{C}_2-\text{O}_1-\text{O}_3)$ | 134.4045563 | 133.3380614 |
| $\angle(\text{O}_3-\text{C}_2-\text{C}_4)$ | 62.0919179  | 61.6352607  |

Table S22:  $^{12}\text{C}(^{16}\text{O})^{18}\text{O}^{12}\text{C}$  Fermi Resonances

|                                                    |
|----------------------------------------------------|
| $2\nu_3 = \nu_3 + \nu_2 = \nu_1$                   |
| $2\nu_4 = \nu_2$                                   |
| $2\nu_4 = 2\nu_5 = 2\nu_6 = \nu_6 + \nu_5 = \nu_3$ |

Table S23:  $^{12}\text{C}(^{18}\text{O})^{16}\text{O}^{12}\text{C}$  Frequencies and ZPVE

|                           | Description                                                                                 | Frequencies [ $\text{cm}^{-1}$ ] |
|---------------------------|---------------------------------------------------------------------------------------------|----------------------------------|
| $\omega_1$                | $\text{O}_1-\text{C}_1$ stretch                                                             | 1996.5                           |
| $\omega_2$                | $\text{O}_2-\text{C}_2$ stretch                                                             | 1231.7                           |
| $\omega_3$                | $\text{C}_1-\text{O}_2-\text{C}_2$ bend                                                     | 931.3                            |
| $\omega_4$                | $(\text{C}_1-\text{O}_2 \text{ stretch}) + (\text{O}_1-\text{C}_1-\text{O}_2 \text{ bend})$ | 512.2                            |
| $\omega_5$                | out-of-plane bend                                                                           | 503.7                            |
| $\omega_6$                | $(\text{C}_1-\text{O}_2 \text{ stretch}) - (\text{O}_1-\text{C}_1-\text{O}_2 \text{ bend})$ | 475.0                            |
| $\nu_1$                   | $\text{O}_1-\text{C}_1$ stretch                                                             | 1973.6                           |
| $\nu_2$                   | $\text{O}_2-\text{C}_2$ stretch                                                             | 1242.0                           |
| $\nu_3$                   | $\text{C}_1-\text{O}_2-\text{C}_2$ bend                                                     | 904.0                            |
| $\nu_4$                   | $(\text{C}_1-\text{O}_2 \text{ stretch}) + (\text{O}_1-\text{C}_1-\text{O}_2 \text{ bend})$ | 439.5                            |
| $\nu_5$                   | out-of-plane bend                                                                           | 488.7                            |
| $\nu_6$                   | $(\text{C}_1-\text{O}_2 \text{ stretch}) - (\text{O}_1-\text{C}_1-\text{O}_2 \text{ bend})$ | 318.2                            |
| ZPVE [ $\text{cm}^{-1}$ ] |                                                                                             | 2775.4                           |

Table S24:  $^{12}\text{C}(^{18}\text{O})^{16}\text{O}^{12}\text{C}$  Rotational Constants [MHz]

|          |          |
|----------|----------|
| $A_e$    | 38835.7  |
| $B_e$    | 7856.1   |
| $C_e$    | 6534.3   |
| $A_0$    | 38815.3  |
| $B_0$    | 7755.2   |
| $C_0$    | 6451.5   |
| $\kappa$ | -0.91943 |
| $A_1$    | 38810.6  |
| $B_1$    | 7714.0   |
| $C_1$    | 6423.0   |
| $A_2$    | 38357.0  |
| $B_2$    | 7778.4   |
| $C_2$    | 6457.0   |
| $A_3$    | 38966.3  |
| $B_3$    | 7733.7   |
| $C_3$    | 6436.8   |
| $A_4$    | 39839.2  |
| $B_4$    | 7694.4   |
| $C_4$    | 6396.8   |
| $A_5$    | 43117.7  |
| $B_5$    | 7759.7   |
| $C_5$    | 6462.4   |
| $A_6$    | 33760.5  |
| $B_6$    | 7649.1   |
| $C_6$    | 6367.2   |

Table S25:  $^{12}\text{C}(^{18}\text{O})^{16}\text{O}^{12}\text{C}$  Quartic and Sextic Distortion Constants

| Constant      | Units |          |
|---------------|-------|----------|
| $\Delta_J$    | kHz   | 3.000    |
| $\Delta_K$    | kHz   | 156.337  |
| $\Delta_{JK}$ | kHz   | 46.223   |
| $\delta_J$    | Hz    | 562.919  |
| $\delta_K$    | kHz   | 32.658   |
| $\Phi_J$      | mHz   | -9.191   |
| $\Phi_K$      | Hz    | -2.177   |
| $\Phi_{JK}$   | mHz   | -274.488 |
| $\Phi_{KJ}$   | Hz    | 2.115    |
| $\phi_j$      | mHz   | -2.295   |
| $\phi_{jk}$   | mHz   | -204.119 |
| $\phi_k$      | Hz    | 3.464    |

Table S26:  $^{12}\text{C}(^{18}\text{O})^{16}\text{O}^{12}\text{C}$  Geometry [ $\text{\AA}$  or Deg]

| Coordinate                                 | $r_e$       | $r_0$       |
|--------------------------------------------|-------------|-------------|
| $r(\text{O}_1-\text{C}_2)$                 | 1.1717212   | 1.1703408   |
| $r(\text{C}_2-\text{O}_3)$                 | 1.4387035   | 1.4719488   |
| $r(\text{O}_3-\text{C}_4)$                 | 1.3594921   | 1.3566623   |
| $\angle(\text{C}_2-\text{O}_1-\text{O}_3)$ | 134.4045563 | 133.3236999 |
| $\angle(\text{O}_3-\text{C}_2-\text{C}_4)$ | 62.0919179  | 61.6165057  |

Table S27:  $^{12}\text{C}(^{18}\text{O})^{16}\text{O}^{12}\text{C}$  Fermi Resonances

|                                                                                                    |
|----------------------------------------------------------------------------------------------------|
| $2\nu_3 = \nu_3 + \nu_2 = \nu_1$ $\nu_6 + \nu_3 = \nu_2$ $2\nu_5 = 2\nu_6 = \nu_6 + \nu_4 = \nu_3$ |
|----------------------------------------------------------------------------------------------------|

Table S28:  $^{12}\text{C}(^{18}\text{O})^{18}\text{O}^{12}\text{C}$  Frequencies and ZPVE

|                           | Description                                                                                 | Frequencies [ $\text{cm}^{-1}$ ] |
|---------------------------|---------------------------------------------------------------------------------------------|----------------------------------|
| $\omega_1$                | $\text{O}_1-\text{C}_1$ stretch                                                             | 1996.5                           |
| $\omega_2$                | $\text{O}_2-\text{C}_2$ stretch                                                             | 1204.7                           |
| $\omega_3$                | $\text{C}_1-\text{O}_2-\text{C}_2$ bend                                                     | 924.0                            |
| $\omega_4$                | $(\text{C}_1-\text{O}_2 \text{ stretch}) + (\text{O}_1-\text{C}_1-\text{O}_2 \text{ bend})$ | 503.6                            |
| $\omega_5$                | out-of-plane bend                                                                           | 495.0                            |
| $\omega_6$                | $(\text{C}_1-\text{O}_2 \text{ stretch}) - (\text{O}_1-\text{C}_1-\text{O}_2 \text{ bend})$ | 473.1                            |
| $\nu_1$                   | $\text{O}_1-\text{C}_1$ stretch                                                             | 1972.7                           |
| $\nu_2$                   | $\text{O}_2-\text{C}_2$ stretch                                                             | 1212.7                           |
| $\nu_3$                   | $\text{C}_1-\text{O}_2-\text{C}_2$ bend                                                     | 895.4                            |
| $\nu_4$                   | $(\text{C}_1-\text{O}_2 \text{ stretch}) + (\text{O}_1-\text{C}_1-\text{O}_2 \text{ bend})$ | 488.7                            |
| $\nu_5$                   | out-of-plane bend                                                                           | 455.9                            |
| $\nu_6$                   | $(\text{C}_1-\text{O}_2 \text{ stretch}) - (\text{O}_1-\text{C}_1-\text{O}_2 \text{ bend})$ | 291.4                            |
| ZPVE [ $\text{cm}^{-1}$ ] |                                                                                             | 2749.6                           |

Table S29:  $^{12}\text{C}(^{18}\text{O})^{18}\text{O}^{12}\text{C}$  Rotational Constants [MHz]

|          |          |
|----------|----------|
| $A_e$    | 36673.3  |
| $B_e$    | 7652.8   |
| $C_e$    | 6331.6   |
| $A_0$    | 36666.0  |
| $B_0$    | 7552.7   |
| $C_0$    | 6250.9   |
| $\kappa$ | -0.91440 |
| $A_1$    | 36653.4  |
| $B_1$    | 7514.4   |
| $C_1$    | 6224.4   |
| $A_2$    | 36254.4  |
| $B_2$    | 7574.2   |
| $C_2$    | 6255.9   |
| $A_3$    | 36789.0  |
| $B_3$    | 7534.3   |
| $C_3$    | 6237.4   |
| $A_4$    | 40350.9  |
| $B_4$    | 7562.1   |
| $C_4$    | 6261.1   |
| $A_5$    | 36879.5  |
| $B_5$    | 7516.0   |
| $C_5$    | 6222.2   |
| $A_6$    | 33053.8  |
| $B_6$    | 7414.9   |
| $C_6$    | 6143.0   |



Table S30:  $^{12}\text{C}(^{18}\text{O})^{18}\text{O}^{12}\text{C}$  Quartic and Sextic Distortion Constants

| Constant      | Units |          |
|---------------|-------|----------|
| $\Delta_J$    | kHz   | 3.002    |
| $\Delta_K$    | kHz   | 136.321  |
| $\Delta_{JK}$ | kHz   | 41.991   |
| $\delta_J$    | Hz    | 580.245  |
| $\delta_K$    | kHz   | 30.579   |
| $\Phi_J$      | mHz   | -10.228  |
| $\Phi_K$      | Hz    | -2.035   |
| $\Phi_{JK}$   | mHz   | -235.034 |
| $\Phi_{KJ}$   | Hz    | 1.925    |
| $\phi_j$      | mHz   | -2.694   |
| $\phi_{jk}$   | mHz   | -195.277 |
| $\phi_k$      | Hz    | 3.014    |

Table S31:  $^{12}\text{C}(^{18}\text{O})^{18}\text{O}^{12}\text{C}$  Geometry [ $\text{\AA}$  or Deg]

| Coordinate                                 | $r_e$       | $r_0$       |
|--------------------------------------------|-------------|-------------|
| $r(\text{O}_1-\text{C}_2)$                 | 1.1717212   | 1.1704062   |
| $r(\text{C}_2-\text{O}_3)$                 | 1.4387035   | 1.4712159   |
| $r(\text{O}_3-\text{C}_4)$                 | 1.3594921   | 1.3566927   |
| $\angle(\text{C}_2-\text{O}_1-\text{O}_3)$ | 134.4045563 | 133.3363692 |
| $\angle(\text{O}_3-\text{C}_2-\text{C}_4)$ | 62.0919179  | 61.6330167  |

Table S32:  $^{12}\text{C}(^{18}\text{O})^{18}\text{O}^{12}\text{C}$  Fermi Resonances

|                                                    |
|----------------------------------------------------|
| $2\nu_3 = \nu_3 + \nu_2 = \nu_1$                   |
| $2\nu_4 = \nu_6 + \nu_3 = \nu_2$                   |
| $2\nu_4 = 2\nu_5 = 2\nu_6 = \nu_6 + \nu_5 = \nu_3$ |

Table S33:  $^{13}\text{C}(^{16}\text{O})^{16}\text{O}^{12}\text{C}$  Frequencies and ZPVE

|                           | Description                                                                                 | Frequencies [ $\text{cm}^{-1}$ ] |
|---------------------------|---------------------------------------------------------------------------------------------|----------------------------------|
| $\omega_1$                | $\text{O}_1-\text{C}_1$ stretch                                                             | 1978.2                           |
| $\omega_2$                | $\text{O}_2-\text{C}_2$ stretch                                                             | 1234.9                           |
| $\omega_3$                | $\text{C}_1-\text{O}_2-\text{C}_2$ bend                                                     | 940.4                            |
| $\omega_4$                | $(\text{C}_1-\text{O}_2 \text{ stretch}) + (\text{O}_1-\text{C}_1-\text{O}_2 \text{ bend})$ | 517.0                            |
| $\omega_5$                | out-of-plane bend                                                                           | 493.5                            |
| $\omega_6$                | $(\text{C}_1-\text{O}_2 \text{ stretch}) - (\text{O}_1-\text{C}_1-\text{O}_2 \text{ bend})$ | 466.4                            |
| $\nu_1$                   | $\text{O}_1-\text{C}_1$ stretch                                                             | 1957.0                           |
| $\nu_2$                   | $\text{O}_2-\text{C}_2$ stretch                                                             | 1246.1                           |
| $\nu_3$                   | $\text{C}_1-\text{O}_2-\text{C}_2$ bend                                                     | 912.0                            |
| $\nu_4$                   | $(\text{C}_1-\text{O}_2 \text{ stretch}) + (\text{O}_1-\text{C}_1-\text{O}_2 \text{ bend})$ | 451.8                            |
| $\nu_5$                   | out-of-plane bend                                                                           | 479.3                            |
| $\nu_6$                   | $(\text{C}_1-\text{O}_2 \text{ stretch}) - (\text{O}_1-\text{C}_1-\text{O}_2 \text{ bend})$ | 308.5                            |
| ZPVE [ $\text{cm}^{-1}$ ] |                                                                                             | 2767.4                           |

Table S34:  $^{13}\text{C}(^{16}\text{O})^{16}\text{O}^{12}\text{C}$  Rotational Constants [MHz]

|          |          |
|----------|----------|
| $A_e$    | 38741.3  |
| $B_e$    | 8372.9   |
| $C_e$    | 6884.7   |
| $A_0$    | 38706.2  |
| $B_0$    | 8264.5   |
| $C_0$    | 6796.8   |
| $\kappa$ | -0.90801 |
| $A_1$    | 38698.2  |
| $B_1$    | 8224.9   |
| $C_1$    | 6769.9   |
| $A_2$    | 38262.6  |
| $B_2$    | 8288.8   |
| $C_2$    | 6801.9   |
| $A_3$    | 38832.3  |
| $B_3$    | 8244.4   |
| $C_3$    | 6783.3   |
| $A_4$    | 39366.0  |
| $B_4$    | 8204.4   |
| $C_4$    | 6739.9   |
| $A_5$    | 43600.0  |
| $B_5$    | 8267.8   |
| $C_5$    | 6807.8   |
| $A_6$    | 33408.4  |
| $B_6$    | 8140.5   |
| $C_6$    | 6702.2   |

Table S35:  $^{13}\text{C}(^{16}\text{O})^{16}\text{O}^{12}\text{C}$  Quartic and Sextic Distortion Constants

| Constant      | Units |          |
|---------------|-------|----------|
| $\Delta_J$    | kHz   | 3.479    |
| $\Delta_K$    | kHz   | 147.731  |
| $\Delta_{JK}$ | kHz   | 51.114   |
| $\delta_J$    | Hz    | 685.213  |
| $\delta_K$    | kHz   | 36.072   |
| $\Phi_J$      | mHz   | -12.356  |
| $\Phi_K$      | Hz    | -2.386   |
| $\Phi_{JK}$   | mHz   | -364.548 |
| $\Phi_{KJ}$   | Hz    | 2.451    |
| $\phi_j$      | mHz   | -3.226   |
| $\phi_{jk}$   | mHz   | -265.785 |
| $\phi_k$      | Hz    | 3.612    |

Table S36:  $^{13}\text{C}(^{16}\text{O})^{16}\text{O}^{12}\text{C}$  Geometry [ $\text{\AA}$  or Deg]

| Coordinate                                 | $r_e$       | $r_0$       |
|--------------------------------------------|-------------|-------------|
| $r(\text{O}_1-\text{C}_2)$                 | 1.1717212   | 1.1704055   |
| $r(\text{C}_2-\text{O}_3)$                 | 1.4387035   | 1.4711731   |
| $r(\text{O}_3-\text{C}_4)$                 | 1.3594921   | 1.3569285   |
| $\angle(\text{C}_2-\text{O}_1-\text{O}_3)$ | 134.4045563 | 133.3576373 |
| $\angle(\text{O}_3-\text{C}_2-\text{C}_4)$ | 62.0919179  | 61.6300776  |

Table S37:  $^{13}\text{C}(^{16}\text{O})^{16}\text{O}^{12}\text{C}$  Fermi Resonances

|                                                    |
|----------------------------------------------------|
| $2\nu_3 = \nu_3 + \nu_2 = \nu_1$                   |
| $\nu_6 + \nu_3 = \nu_2$                            |
| $2\nu_4 = 2\nu_5 = 2\nu_6 = \nu_6 + \nu_4 = \nu_3$ |

Table S38:  $^{13}\text{C}(^{16}\text{O})^{16}\text{O}^{13}\text{C}$  Frequencies and ZPVE

|                           | Description                                                                                 | Frequencies [ $\text{cm}^{-1}$ ] |
|---------------------------|---------------------------------------------------------------------------------------------|----------------------------------|
| $\omega_1$                | $\text{O}_1-\text{C}_1$ stretch                                                             | 1975.2                           |
| $\omega_2$                | $\text{O}_2-\text{C}_2$ stretch                                                             | 1209.5                           |
| $\omega_3$                | $\text{C}_1-\text{O}_2-\text{C}_2$ bend                                                     | 925.9                            |
| $\omega_4$                | $(\text{C}_1-\text{O}_2 \text{ stretch}) + (\text{O}_1-\text{C}_1-\text{O}_2 \text{ bend})$ | 513.8                            |
| $\omega_5$                | out-of-plane bend                                                                           | 491.4                            |
| $\omega_6$                | $(\text{C}_1-\text{O}_2 \text{ stretch}) - (\text{O}_1-\text{C}_1-\text{O}_2 \text{ bend})$ | 462.7                            |
| $\nu_1$                   | $\text{O}_1-\text{C}_1$ stretch                                                             | 1953.8                           |
| $\nu_2$                   | $\text{O}_2-\text{C}_2$ stretch                                                             | 1223.4                           |
| $\nu_3$                   | $\text{C}_1-\text{O}_2-\text{C}_2$ bend                                                     | 899.0                            |
| $\nu_4$                   | $(\text{C}_1-\text{O}_2 \text{ stretch}) + (\text{O}_1-\text{C}_1-\text{O}_2 \text{ bend})$ | 445.1                            |
| $\nu_5$                   | out-of-plane bend                                                                           | 477.2                            |
| $\nu_6$                   | $(\text{C}_1-\text{O}_2 \text{ stretch}) - (\text{O}_1-\text{C}_1-\text{O}_2 \text{ bend})$ | 310.2                            |
| ZPVE [ $\text{cm}^{-1}$ ] |                                                                                             | 2741.7                           |

Table S39:  $^{13}\text{C}(^{16}\text{O})^{16}\text{O}^{13}\text{C}$  Rotational Constants [MHz]

|          |          |
|----------|----------|
| $A_e$    | 37358.0  |
| $B_e$    | 8222.1   |
| $C_e$    | 6739.0   |
| $A_0$    | 37338.8  |
| $B_0$    | 8117.8   |
| $C_0$    | 6654.9   |
| $\kappa$ | -0.90464 |
| $A_1$    | 37334.7  |
| $B_1$    | 8077.8   |
| $C_1$    | 6628.0   |
| $A_2$    | 36911.2  |
| $B_2$    | 8140.4   |
| $C_2$    | 6658.5   |
| $A_3$    | 37477.2  |
| $B_3$    | 8096.1   |
| $C_3$    | 6641.4   |
| $A_4$    | 37891.7  |
| $B_4$    | 8057.8   |
| $C_4$    | 6599.4   |
| $A_5$    | 41707.7  |
| $B_5$    | 8121.3   |
| $C_5$    | 6665.7   |
| $A_6$    | 32671.8  |
| $B_6$    | 8004.9   |
| $C_6$    | 6568.0   |

Table S40:  $^{13}\text{C}(^{16}\text{O})^{16}\text{O}^{13}\text{C}$  Quartic and Sextic Distortion Constants

| Constant      | Units |          |
|---------------|-------|----------|
| $\Delta_J$    | kHz   | 3.241    |
| $\Delta_K$    | kHz   | 139.535  |
| $\Delta_{JK}$ | kHz   | 49.548   |
| $\delta_J$    | Hz    | 647.794  |
| $\delta_K$    | kHz   | 34.492   |
| $\Phi_J$      | mHz   | -10.369  |
| $\Phi_K$      | Hz    | -2.224   |
| $\Phi_{JK}$   | mHz   | -345.694 |
| $\Phi_{KJ}$   | Hz    | 2.313    |
| $\phi_j$      | mHz   | -2.739   |
| $\phi_{jk}$   | mHz   | -242.919 |
| $\phi_k$      | Hz    | 3.365    |

Table S41:  $^{13}\text{C}(^{16}\text{O})^{16}\text{O}^{13}\text{C}$  Geometry [ $\text{\AA}$  or Deg]

| Coordinate                                 | $r_e$       | $r_0$       |
|--------------------------------------------|-------------|-------------|
| $r(\text{O}_1-\text{C}_2)$                 | 1.1717212   | 1.1703610   |
| $r(\text{C}_2-\text{O}_3)$                 | 1.4387035   | 1.4712391   |
| $r(\text{O}_3-\text{C}_4)$                 | 1.3594921   | 1.3567757   |
| $\angle(\text{C}_2-\text{O}_1-\text{O}_3)$ | 134.4045563 | 133.3604061 |
| $\angle(\text{O}_3-\text{C}_2-\text{C}_4)$ | 62.0919179  | 61.6277284  |

Table S42:  $^{13}\text{C}(^{16}\text{O})^{16}\text{O}^{13}\text{C}$  Fermi Resonances

$$\begin{array}{l}
2\nu_3 = \nu_3 + \nu_2 = \nu_1 \\
2\nu_4 = \nu_6 + \nu_3 = \nu_2 \\
2\nu_4 = 2\nu_5 = 2\nu_6 = \nu_6 + \nu_4 = \nu_3
\end{array}$$

Table S43:  $\text{c-C}_2\text{O}_2$  Geometry [ $\text{\AA}$  or Deg]

| Coordinate                                 | $r_e$      | $r_0$      |
|--------------------------------------------|------------|------------|
| $r(\text{O}_1-\text{C}_2)$                 | 1.3813041  | 1.3891670  |
| $r(\text{O}_1-\text{C}_3)$                 | 1.3813041  | 1.3891670  |
| $r(\text{O}_1-\text{O}_4)$                 | 1.9840284  | 1.9955788  |
| $\angle(\text{O}_1-\text{O}_4-\text{C}_2)$ | 44.0962196 | 44.0885741 |
| $\angle(\text{O}_1-\text{O}_4-\text{C}_3)$ | 44.0962197 | 44.0885743 |

Table S44:  $\text{c-C}_2\text{O}_2$  Fermi Resonances

$$2\nu_5 = \nu_4$$

Table S45:  $\text{c-}^{12}\text{C}^{12}\text{C}^{16}\text{O}^{18}\text{O}$  Frequencies and ZPVE

|                           | Description                                                                                                                                                             | Frequencies [ $\text{cm}^{-1}$ ] |
|---------------------------|-------------------------------------------------------------------------------------------------------------------------------------------------------------------------|----------------------------------|
| $\omega_1$                | $(\text{O}_1-\text{O}_2 \text{ stretch}) + (\text{C}_1-\text{C}_2 \text{ stretch})$                                                                                     | 1228.6                           |
| $\omega_2$                | $(\text{O}_1-\text{C}_1 \text{ stretch}) + (\text{O}_1-\text{C}_2 \text{ stretch}) - (\text{C}_1-\text{O}_2 \text{ stretch}) - (\text{C}_2-\text{O}_2 \text{ stretch})$ | 1079.8                           |
| $\omega_3$                | $(\text{O}_1-\text{C}_1 \text{ stretch}) - (\text{O}_1-\text{C}_2 \text{ stretch}) + (\text{C}_1-\text{O}_2 \text{ stretch}) - (\text{C}_2-\text{O}_2 \text{ stretch})$ | 1042.7                           |
| $\omega_4$                | $(\text{O}_1-\text{O}_2 \text{ stretch}) - (\text{C}_1-\text{C}_2 \text{ stretch})$                                                                                     | 993.7                            |
| $\omega_5$                | out-of-plane bend                                                                                                                                                       | 439.4                            |
| $\omega_6$                | $(\text{O}_1-\text{C}_1 \text{ stretch}) - (\text{O}_1-\text{C}_2 \text{ stretch}) - (\text{C}_1-\text{O}_2 \text{ stretch}) + (\text{C}_2-\text{O}_2 \text{ stretch})$ | 370.0                            |
| $\nu_1$                   | $(\text{O}_1-\text{O}_2 \text{ stretch}) + (\text{C}_1-\text{C}_2 \text{ stretch})$                                                                                     | 1236.6                           |
| $\nu_2$                   | $(\text{O}_1-\text{C}_1 \text{ stretch}) + (\text{O}_1-\text{C}_2 \text{ stretch}) - (\text{C}_1-\text{O}_2 \text{ stretch}) - (\text{C}_2-\text{O}_2 \text{ stretch})$ | 1016.9                           |
| $\nu_3$                   | $(\text{O}_1-\text{C}_1 \text{ stretch}) - (\text{O}_1-\text{C}_2 \text{ stretch}) + (\text{C}_1-\text{O}_2 \text{ stretch}) - (\text{C}_2-\text{O}_2 \text{ stretch})$ | 998.3                            |
| $\nu_4$                   | $(\text{O}_1-\text{O}_2 \text{ stretch}) - (\text{C}_1-\text{C}_2 \text{ stretch})$                                                                                     | 974.9                            |
| $\nu_5$                   | out-of-plane bend                                                                                                                                                       | 366.0                            |
| $\nu_6$                   | $(\text{O}_1-\text{C}_1 \text{ stretch}) - (\text{O}_1-\text{C}_2 \text{ stretch}) - (\text{C}_1-\text{O}_2 \text{ stretch}) + (\text{C}_2-\text{O}_2 \text{ stretch})$ | 311.0                            |
| ZPVE [ $\text{cm}^{-1}$ ] |                                                                                                                                                                         | 2538.3                           |

Table S46: c-<sup>12</sup>C<sup>12</sup>C<sup>16</sup>O<sup>18</sup>O Rotational Constants [MHz]

|          |          |
|----------|----------|
| $A_e$    | 23278.3  |
| $B_e$    | 14846.6  |
| $C_e$    | 9282.8   |
| $A_0$    | 23049.6  |
| $B_0$    | 14768.8  |
| $C_0$    | 9158.0   |
| $\kappa$ | -0.19220 |
| $A_1$    | 22996.9  |
| $B_1$    | 14735.6  |
| $C_1$    | 9133.4   |
| $A_2$    | 22943.0  |
| $B_2$    | 14755.1  |
| $C_2$    | 9121.4   |
| $A_3$    | 23098.8  |
| $B_3$    | 14716.4  |
| $C_3$    | 9136.0   |
| $A_4$    | 23077.4  |
| $B_4$    | 14735.5  |
| $C_4$    | 9145.2   |
| $A_5$    | 22827.0  |
| $B_5$    | 14807.0  |
| $C_5$    | 9135.3   |
| $A_6$    | 22897.7  |
| $B_6$    | 14707.5  |
| $C_6$    | 9026.9   |

Table S47: c-<sup>12</sup>C<sup>12</sup>C<sup>16</sup>O<sup>18</sup>O Quartic and Sextic Distortion Constants

| Constant      | Units |          |
|---------------|-------|----------|
| $\Delta_J$    | kHz   | 8.995    |
| $\Delta_K$    | kHz   | -139.741 |
| $\Delta_{JK}$ | kHz   | 176.181  |
| $\delta_J$    | kHz   | 2.972    |
| $\delta_K$    | kHz   | 100.084  |
| $\Phi_J$      | mHz   | 12.872   |
| $\Phi_K$      | Hz    | 6.801    |
| $\Phi_{JK}$   | Hz    | -1.047   |
| $\Phi_{KJ}$   | Hz    | -5.605   |
| $\phi_j$      | mHz   | 6.163    |
| $\phi_{jk}$   | mHz   | -507.164 |
| $\phi_k$      | Hz    | 1.397    |

Table S48: c-<sup>12</sup>C<sup>12</sup>C<sup>16</sup>O<sup>18</sup>O Geometry [Å or Deg]

| Coordinate                                                 | $r_e$      | $r_0$      |
|------------------------------------------------------------|------------|------------|
| r(O <sub>1</sub> –C <sub>2</sub> )                         | 1.3813041  | 1.3891216  |
| r(O <sub>1</sub> –C <sub>3</sub> )                         | 1.3813041  | 1.3891216  |
| r(O <sub>1</sub> –O <sub>4</sub> )                         | 1.9840284  | 1.9954322  |
| $\angle$ (O <sub>1</sub> –O <sub>4</sub> –C <sub>2</sub> ) | 44.0962196 | 44.0860097 |
| $\angle$ (O <sub>1</sub> –O <sub>4</sub> –C <sub>3</sub> ) | 44.0962197 | 44.0860099 |

Table S49: c-<sup>12</sup>C<sup>12</sup>C<sup>16</sup>O<sup>18</sup>O Fermi Resonances

|                         |
|-------------------------|
| $\nu_6 + \nu_3 = \nu_1$ |
| $2\nu_5 = \nu_4$        |

Table S50: c-<sup>12</sup>C<sup>12</sup>C<sup>18</sup>O<sup>18</sup>O Frequencies and ZPVE

|                          | Description                                                                                                                                                               | Frequencies [cm <sup>-1</sup> ] |
|--------------------------|---------------------------------------------------------------------------------------------------------------------------------------------------------------------------|---------------------------------|
| $\omega_1$               | (O <sub>1</sub> -O <sub>2</sub> stretch) + (C <sub>1</sub> -C <sub>2</sub> stretch)                                                                                       | 1219.9                          |
| $\omega_2$               | (O <sub>1</sub> -C <sub>1</sub> stretch) + (O <sub>1</sub> -C <sub>2</sub> stretch) - (C <sub>1</sub> -O <sub>2</sub> stretch) - (C <sub>2</sub> -O <sub>2</sub> stretch) | 1063.7                          |
| $\omega_3$               | (O <sub>1</sub> -C <sub>1</sub> stretch) - (O <sub>1</sub> -C <sub>2</sub> stretch) + (C <sub>1</sub> -O <sub>2</sub> stretch) - (C <sub>2</sub> -O <sub>2</sub> stretch) | 1030.2                          |
| $\omega_4$               | (O <sub>1</sub> -O <sub>2</sub> stretch) - (C <sub>1</sub> -C <sub>2</sub> stretch)                                                                                       | 972.7                           |
| $\omega_5$               | out-of-plane bend                                                                                                                                                         | 434.5                           |
| $\omega_6$               | (O <sub>1</sub> -C <sub>1</sub> stretch) - (O <sub>1</sub> -C <sub>2</sub> stretch) - (C <sub>1</sub> -O <sub>2</sub> stretch) + (C <sub>2</sub> -O <sub>2</sub> stretch) | 365.9                           |
| $\nu_1$                  | (O <sub>1</sub> -O <sub>2</sub> stretch) + (C <sub>1</sub> -C <sub>2</sub> stretch)                                                                                       | 1228.4                          |
| $\nu_2$                  | (O <sub>1</sub> -C <sub>1</sub> stretch) + (O <sub>1</sub> -C <sub>2</sub> stretch) - (C <sub>1</sub> -O <sub>2</sub> stretch) - (C <sub>2</sub> -O <sub>2</sub> stretch) | 1000.8                          |
| $\nu_3$                  | (O <sub>1</sub> -C <sub>1</sub> stretch) - (O <sub>1</sub> -C <sub>2</sub> stretch) + (C <sub>1</sub> -O <sub>2</sub> stretch) - (C <sub>2</sub> -O <sub>2</sub> stretch) | 987.0                           |
| $\nu_4$                  | (O <sub>1</sub> -O <sub>2</sub> stretch) - (C <sub>1</sub> -C <sub>2</sub> stretch)                                                                                       | 957.6                           |
| $\nu_5$                  | out-of-plane bend                                                                                                                                                         | 362.8                           |
| $\nu_6$                  | (O <sub>1</sub> -C <sub>1</sub> stretch) - (O <sub>1</sub> -C <sub>2</sub> stretch) - (C <sub>1</sub> -O <sub>2</sub> stretch) + (C <sub>2</sub> -O <sub>2</sub> stretch) | 308.3                           |
| ZPVE [cm <sup>-1</sup> ] |                                                                                                                                                                           | 2505.8                          |

Table S51: c-<sup>12</sup>C<sup>12</sup>C<sup>18</sup>O<sup>18</sup>O Rotational Constants [MHz]

|          |          |
|----------|----------|
| $A_e$    | 23260.6  |
| $B_e$    | 14000.9  |
| $C_e$    | 8947.6   |
| $A_0$    | 23037.5  |
| $B_0$    | 13926.5  |
| $C_0$    | 8829.6   |
| $\kappa$ | -0.28253 |
| $A_1$    | 22990.0  |
| $B_1$    | 13896.4  |
| $C_1$    | 8807.1   |
| $A_2$    | 22924.9  |
| $B_2$    | 13913.9  |
| $C_2$    | 8793.8   |
| $A_3$    | 23086.7  |
| $B_3$    | 13877.9  |
| $C_3$    | 8802.1   |
| $A_4$    | 23070.9  |
| $B_4$    | 13893.4  |
| $C_4$    | 8824.1   |
| $A_5$    | 22817.9  |
| $B_5$    | 13961.3  |
| $C_5$    | 8809.2   |
| $A_6$    | 22888.7  |
| $B_6$    | 13867.4  |
| $C_6$    | 8705.6   |

Table S52: c-<sup>12</sup>C<sup>12</sup>C<sup>18</sup>O<sup>18</sup>O Quartic and Sextic Distortion Constants

| Constant      | Units |          |
|---------------|-------|----------|
| $\Delta_J$    | kHz   | 8.011    |
| $\Delta_K$    | kHz   | -127.614 |
| $\Delta_{JK}$ | kHz   | 164.701  |
| $\delta_J$    | kHz   | 2.594    |
| $\delta_K$    | kHz   | 93.688   |
| $\Phi_J$      | mHz   | 10.458   |
| $\Phi_K$      | Hz    | 6.301    |
| $\Phi_{JK}$   | mHz   | -955.975 |
| $\Phi_{KJ}$   | Hz    | -5.195   |
| $\phi_j$      | mHz   | 4.988    |
| $\phi_{jk}$   | mHz   | -463.898 |
| $\phi_k$      | Hz    | 1.607    |

Table S53: c-<sup>12</sup>C<sup>12</sup>C<sup>18</sup>O<sup>18</sup>O Geometry [Å or Deg]

| Coordinate                                         | r <sub>e</sub> | r <sub>0</sub> |
|----------------------------------------------------|----------------|----------------|
| r(O <sub>1</sub> –C <sub>2</sub> )                 | 1.3813041      | 1.3889568      |
| r(O <sub>1</sub> –C <sub>3</sub> )                 | 1.3813041      | 1.3889568      |
| r(O <sub>1</sub> –O <sub>4</sub> )                 | 1.9840284      | 1.9952869      |
| ∠(O <sub>1</sub> –O <sub>4</sub> –C <sub>2</sub> ) | 44.0962196     | 44.0882770     |
| ∠(O <sub>1</sub> –O <sub>4</sub> –C <sub>3</sub> ) | 44.0962197     | 44.0882772     |

Table S54: c-<sup>12</sup>C<sup>12</sup>C<sup>18</sup>O<sup>18</sup>O Fermi Resonances

$$2\nu_5 = \nu_4$$

Table S55: c-<sup>13</sup>C<sup>12</sup>C<sup>16</sup>O<sup>16</sup>O Frequencies and ZPVE

|                          | Description                                                                                                                                                               | Frequencies [cm <sup>-1</sup> ] |
|--------------------------|---------------------------------------------------------------------------------------------------------------------------------------------------------------------------|---------------------------------|
| $\omega_1$               | (O <sub>1</sub> –O <sub>2</sub> stretch) + (C <sub>1</sub> –C <sub>2</sub> stretch)                                                                                       | 1221.4                          |
| $\omega_2$               | (O <sub>1</sub> –C <sub>1</sub> stretch) + (O <sub>1</sub> –C <sub>2</sub> stretch) - (C <sub>1</sub> –O <sub>2</sub> stretch) - (C <sub>2</sub> –O <sub>2</sub> stretch) | 1078.9                          |
| $\omega_3$               | (O <sub>1</sub> –C <sub>1</sub> stretch) - (O <sub>1</sub> –C <sub>2</sub> stretch) + (C <sub>1</sub> –O <sub>2</sub> stretch) - (C <sub>2</sub> –O <sub>2</sub> stretch) | 1044.1                          |
| $\omega_4$               | (O <sub>1</sub> –O <sub>2</sub> stretch) - (C <sub>1</sub> –C <sub>2</sub> stretch)                                                                                       | 1012.0                          |
| $\omega_5$               | out-of-plane bend                                                                                                                                                         | 439.0                           |
| $\omega_6$               | (O <sub>1</sub> –C <sub>1</sub> stretch) - (O <sub>1</sub> –C <sub>2</sub> stretch) - (C <sub>1</sub> –O <sub>2</sub> stretch) + (C <sub>2</sub> –O <sub>2</sub> stretch) | 369.9                           |
| $\nu_1$                  | (O <sub>1</sub> –O <sub>2</sub> stretch) + (C <sub>1</sub> –C <sub>2</sub> stretch)                                                                                       | 1231.9                          |
| $\nu_2$                  | (O <sub>1</sub> –C <sub>1</sub> stretch) + (O <sub>1</sub> –C <sub>2</sub> stretch) - (C <sub>1</sub> –O <sub>2</sub> stretch) - (C <sub>2</sub> –O <sub>2</sub> stretch) | 1014.4                          |
| $\nu_3$                  | (O <sub>1</sub> –C <sub>1</sub> stretch) - (O <sub>1</sub> –C <sub>2</sub> stretch) + (C <sub>1</sub> –O <sub>2</sub> stretch) - (C <sub>2</sub> –O <sub>2</sub> stretch) | 1002.1                          |
| $\nu_4$                  | (O <sub>1</sub> –O <sub>2</sub> stretch) - (C <sub>1</sub> –C <sub>2</sub> stretch)                                                                                       | 989.4                           |
| $\nu_5$                  | out-of-plane bend                                                                                                                                                         | 365.7                           |
| $\nu_6$                  | (O <sub>1</sub> –C <sub>1</sub> stretch) - (O <sub>1</sub> –C <sub>2</sub> stretch) - (C <sub>1</sub> –O <sub>2</sub> stretch) + (C <sub>2</sub> –O <sub>2</sub> stretch) | 310.8                           |
| ZPVE [cm <sup>-1</sup> ] |                                                                                                                                                                           | 2543.8                          |

Table S56: c-<sup>13</sup>C<sup>12</sup>C<sup>16</sup>O<sup>16</sup>O Rotational Constants [MHz]

|          |          |
|----------|----------|
| $A_e$    | 22387.0  |
| $B_e$    | 15727.4  |
| $C_e$    | 9463.5   |
| $A_0$    | 22163.0  |
| $B_0$    | 15648.2  |
| $C_0$    | 9334.5   |
| $\kappa$ | -0.01568 |
| $A_1$    | 22108.3  |
| $B_1$    | 15608.6  |
| $C_1$    | 9307.6   |
| $A_2$    | 22052.8  |
| $B_2$    | 15687.1  |
| $C_2$    | 9294.6   |
| $A_3$    | 22214.5  |
| $B_3$    | 15587.8  |
| $C_3$    | 9306.6   |
| $A_4$    | 22191.7  |
| $B_4$    | 15570.2  |
| $C_4$    | 9331.2   |
| $A_5$    | 21948.7  |
| $B_5$    | 15690.2  |
| $C_5$    | 9309.2   |
| $A_6$    | 22014.4  |
| $B_6$    | 15587.2  |
| $C_6$    | 9199.5   |

Table S57: c-<sup>13</sup>C<sup>12</sup>C<sup>16</sup>O<sup>16</sup>O Quartic and Sextic Distortion Constants

| Constant      | Units |          |
|---------------|-------|----------|
| $\Delta_J$    | kHz   | 10.048   |
| $\Delta_K$    | kHz   | -148.516 |
| $\Delta_{JK}$ | kHz   | 180.953  |
| $\delta_J$    | kHz   | 3.424    |
| $\delta_K$    | kHz   | 102.581  |
| $\Phi_J$      | mHz   | 16.045   |
| $\Phi_K$      | Hz    | 6.833    |
| $\Phi_{JK}$   | Hz    | -1.086   |
| $\Phi_{KJ}$   | Hz    | -5.618   |
| $\phi_j$      | mHz   | 7.725    |
| $\phi_{jk}$   | mHz   | -524.101 |
| $\phi_k$      | mHz   | 851.357  |

Table S58: c-<sup>13</sup>C<sup>12</sup>C<sup>16</sup>O<sup>16</sup>O Geometry [ $\text{\AA}$  or Deg]

| Coordinate                                 | $r_e$      | $r_0$      |
|--------------------------------------------|------------|------------|
| $r(\text{O}_1-\text{C}_2)$                 | 1.3813041  | 1.3890322  |
| $r(\text{O}_1-\text{C}_3)$                 | 1.3813041  | 1.3891362  |
| $r(\text{O}_1-\text{O}_4)$                 | 1.9840284  | 1.9954515  |
| $\angle(\text{O}_1-\text{O}_4-\text{C}_2)$ | 44.0962196 | 44.0865974 |
| $\angle(\text{O}_1-\text{O}_4-\text{C}_3)$ | 44.0962197 | 44.0910515 |

Table S59: c-<sup>13</sup>C<sup>12</sup>C<sup>16</sup>O<sup>16</sup>O Fermi Resonances

$$2\nu_5 = \nu_4$$

Table S60: c-<sup>13</sup>C<sup>13</sup>C<sup>16</sup>O<sup>16</sup>O Frequencies and ZPVE

|                           | Description                                                                                                                                                               | Frequencies [ $\text{cm}^{-1}$ ] |
|---------------------------|---------------------------------------------------------------------------------------------------------------------------------------------------------------------------|----------------------------------|
| $\omega_1$                | (O <sub>1</sub> -O <sub>2</sub> stretch) + (C <sub>1</sub> -C <sub>2</sub> stretch)                                                                                       | 1204.2                           |
| $\omega_2$                | (O <sub>1</sub> -C <sub>1</sub> stretch) + (O <sub>1</sub> -C <sub>2</sub> stretch) - (C <sub>1</sub> -O <sub>2</sub> stretch) - (C <sub>2</sub> -O <sub>2</sub> stretch) | 1066.9                           |
| $\omega_3$                | (O <sub>1</sub> -C <sub>1</sub> stretch) - (O <sub>1</sub> -C <sub>2</sub> stretch) + (C <sub>1</sub> -O <sub>2</sub> stretch) - (C <sub>2</sub> -O <sub>2</sub> stretch) | 1030.9                           |
| $\omega_4$                | (O <sub>1</sub> -O <sub>2</sub> stretch) - (C <sub>1</sub> -C <sub>2</sub> stretch)                                                                                       | 1008.0                           |
| $\omega_5$                | out-of-plane bend                                                                                                                                                         | 433.6                            |
| $\omega_6$                | (O <sub>1</sub> -C <sub>1</sub> stretch) - (O <sub>1</sub> -C <sub>2</sub> stretch) - (C <sub>1</sub> -O <sub>2</sub> stretch) + (C <sub>2</sub> -O <sub>2</sub> stretch) | 365.6                            |
| $\nu_1$                   | (O <sub>1</sub> -O <sub>2</sub> stretch) + (C <sub>1</sub> -C <sub>2</sub> stretch)                                                                                       | 1215.8                           |
| $\nu_2$                   | (O <sub>1</sub> -C <sub>1</sub> stretch) + (O <sub>1</sub> -C <sub>2</sub> stretch) - (C <sub>1</sub> -O <sub>2</sub> stretch) - (C <sub>2</sub> -O <sub>2</sub> stretch) | 1003.9                           |
| $\nu_3$                   | (O <sub>1</sub> -C <sub>1</sub> stretch) - (O <sub>1</sub> -C <sub>2</sub> stretch) + (C <sub>1</sub> -O <sub>2</sub> stretch) - (C <sub>2</sub> -O <sub>2</sub> stretch) | 987.3                            |
| $\nu_4$                   | (O <sub>1</sub> -O <sub>2</sub> stretch) - (C <sub>1</sub> -C <sub>2</sub> stretch)                                                                                       | 986.8                            |
| $\nu_5$                   | out-of-plane bend                                                                                                                                                         | 362.1                            |
| $\nu_6$                   | (O <sub>1</sub> -C <sub>1</sub> stretch) - (O <sub>1</sub> -C <sub>2</sub> stretch) - (C <sub>1</sub> -O <sub>2</sub> stretch) + (C <sub>2</sub> -O <sub>2</sub> stretch) | 307.8                            |
| ZPVE [ $\text{cm}^{-1}$ ] |                                                                                                                                                                           | 2516.6                           |



Table S61: c-<sup>13</sup>C<sup>13</sup>C<sup>16</sup>O<sup>16</sup>O Rotational Constants [MHz]

|          |         |
|----------|---------|
| $A_e$    | 21519.4 |
| $B_e$    | 15719.9 |
| $C_e$    | 9307.4  |
| $A_0$    | 21304.6 |
| $B_0$    | 15643.2 |
| $C_0$    | 9181.3  |
| $\kappa$ | 0.06602 |
| $A_1$    | 21249.6 |
| $B_1$    | 15601.9 |
| $C_1$    | 9153.6  |
| $A_2$    | 21199.4 |
| $B_2$    | 15636.3 |
| $C_2$    | 9143.0  |
| $A_3$    | 21364.5 |
| $B_3$    | 15587.4 |
| $C_3$    | 9153.0  |
| $A_4$    | 21321.6 |
| $B_4$    | 15610.1 |
| $C_4$    | 9180.5  |
| $A_5$    | 21100.9 |
| $B_5$    | 15685.2 |
| $C_5$    | 9145.2  |
| $A_6$    | 21162.4 |
| $B_6$    | 15584.3 |
| $C_6$    | 9060.3  |

Table S62: c-<sup>13</sup>C<sup>13</sup>C<sup>16</sup>O<sup>16</sup>O Quartic and Sextic Distortion Constants

| Constant      | Units |          |
|---------------|-------|----------|
| $\Delta_J$    | kHz   | 10.031   |
| $\Delta_K$    | kHz   | -144.671 |
| $\Delta_{JK}$ | kHz   | 174.031  |
| $\delta_J$    | kHz   | 3.458    |
| $\delta_K$    | kHz   | 98.625   |
| $\Phi_J$      | mHz   | 16.361   |
| $\Phi_K$      | Hz    | 6.365    |
| $\Phi_{JK}$   | Hz    | -1.030   |
| $\Phi_{KJ}$   | Hz    | -5.223   |
| $\phi_j$      | mHz   | 7.896    |
| $\phi_{jk}$   | mHz   | -496.365 |
| $\phi_k$      | mHz   | 593.908  |

Table S63: c-<sup>13</sup>C<sup>13</sup>C<sup>16</sup>O<sup>16</sup>O Geometry [Å or Deg]

| Coordinate                                 | $r_e$      | $r_0$      |
|--------------------------------------------|------------|------------|
| $r(\text{O}_1-\text{C}_2)$                 | 1.3813041  | 1.3890025  |
| $r(\text{O}_1-\text{C}_3)$                 | 1.3813041  | 1.3890025  |
| $r(\text{O}_1-\text{O}_4)$                 | 1.9840284  | 1.9953246  |
| $\angle(\text{O}_1-\text{O}_4-\text{C}_2)$ | 44.0962196 | 44.0891104 |
| $\angle(\text{O}_1-\text{O}_4-\text{C}_3)$ | 44.0962197 | 44.0891105 |

Table S64: c-<sup>13</sup>C<sup>13</sup>C<sup>16</sup>O<sup>16</sup>O Fermi Resonances

$$2\nu_5 = \nu_4$$

Table S65: Si(O)OSi Geometry [Å or Deg]

| Coordinate                                   | $r_e$       | $r_0$       |
|----------------------------------------------|-------------|-------------|
| $r(\text{O}_1-\text{Si}_2)$                  | 1.5142983   | 1.5140618   |
| $r(\text{Si}_2-\text{O}_3)$                  | 1.7009711   | 1.7112598   |
| $r(\text{O}_3-\text{Si}_4)$                  | 1.6660867   | 1.6670303   |
| $\angle(\text{Si}_2-\text{O}_1-\text{O}_3)$  | 125.7978085 | 125.4552259 |
| $\angle(\text{O}_3-\text{Si}_2-\text{Si}_4)$ | 85.1391323  | 85.1899607  |

Table S66: Si(O)OSi Fermi Resonances

|                                                                                                   |
|---------------------------------------------------------------------------------------------------|
| $2\nu_3=\nu_5+\nu_2=\nu_1$<br>$\nu_4+\nu_3=\nu_5+\nu_3=\nu_2$<br>$2\nu_5=\nu_3$<br>$2\nu_6=\nu_4$ |
|---------------------------------------------------------------------------------------------------|

Table S67:  $^{28}\text{Si}(^{16}\text{O})^{16}\text{O}^{29}\text{Si}$  Frequencies and ZPVE

|                           | Description                                 | Frequencies [ $\text{cm}^{-1}$ ] |
|---------------------------|---------------------------------------------|----------------------------------|
| $\omega_1$                | $\text{O}_1\text{--Si}_1$ stretch           | 1246.9                           |
| $\omega_2$                | $\text{O}_2\text{--Si}_2$ stretch           | 855.4                            |
| $\omega_3$                | $\text{Si}_1\text{--O}_2$ stretch           | 603.5                            |
| $\omega_4$                | $\text{Si}_1\text{--O}_2\text{--Si}_2$ bend | 440.7                            |
| $\omega_5$                | $\text{O}_1\text{--Si}_1\text{--O}_2$ bend  | 206.9                            |
| $\omega_6$                | out-of-plane bend                           | 166.7                            |
| $\nu_1$                   | $\text{O}_1\text{--Si}_1$ stretch           | 1234.3                           |
| $\nu_2$                   | $\text{O}_2\text{--Si}_2$ stretch           | 853.2                            |
| $\nu_3$                   | $\text{Si}_1\text{--O}_2$ stretch           | 579.9                            |
| $\nu_4$                   | $\text{Si}_1\text{--O}_2\text{--Si}_2$ bend | 432.6                            |
| $\nu_5$                   | $\text{O}_1\text{--Si}_1\text{--O}_2$ bend  | 203.9                            |
| $\nu_6$                   | out-of-plane bend                           | 166.0                            |
| ZPVE [ $\text{cm}^{-1}$ ] |                                             | 1750.9                           |

Table S68:  $^{28}\text{Si}(^{16}\text{O})^{16}\text{O}^{29}\text{Si}$  Rotational Constants [MHz]

|          |          |
|----------|----------|
| $A_e$    | 26301.4  |
| $B_e$    | 3028.8   |
| $C_e$    | 2716.1   |
| $A_0$    | 26272.2  |
| $B_0$    | 3016.0   |
| $C_0$    | 2703.2   |
| $\kappa$ | -0.97346 |
| $A_1$    | 26310.1  |
| $B_1$    | 3005.0   |
| $C_1$    | 2694.9   |
| $A_2$    | 26114.2  |
| $B_2$    | 3015.3   |
| $C_2$    | 2702.0   |
| $A_3$    | 26085.5  |
| $B_3$    | 3007.4   |
| $C_3$    | 2690.0   |
| $A_4$    | 26479.8  |
| $B_4$    | 3007.3   |
| $C_4$    | 2696.9   |
| $A_5$    | 26326.1  |
| $B_5$    | 3018.4   |
| $C_5$    | 2701.4   |
| $A_6$    | 26259.0  |
| $B_6$    | 3017.0   |
| $C_6$    | 2708.6   |

Table S69:  $^{28}\text{Si}(^{16}\text{O})^{16}\text{O}^{29}\text{Si}$  Quartic and Sextic Distortion Constants

| Constant      | Units |          |
|---------------|-------|----------|
| $\Delta_J$    | Hz    | 464.156  |
| $\Delta_K$    | kHz   | 205.703  |
| $\Delta_{JK}$ | kHz   | -1.478   |
| $\delta_J$    | Hz    | 67.442   |
| $\delta_K$    | kHz   | 3.781    |
| $\Phi_J$      | uHz   | -83.199  |
| $\Phi_K$      | Hz    | 3.651    |
| $\Phi_{JK}$   | mHz   | 14.113   |
| $\Phi_{KJ}$   | mHz   | -497.433 |
| $\phi_j$      | uHz   | -11.585  |
| $\phi_{jk}$   | mHz   | 2.328    |
| $\phi_k$      | mHz   | 555.751  |

Table S70:  $^{28}\text{Si}(^{16}\text{O})^{16}\text{O}^{29}\text{Si}$  Geometry [ $\text{\AA}$  or Deg]

| Coordinate                                   | $r_e$       | $r_0$       |
|----------------------------------------------|-------------|-------------|
| $r(\text{O}_1-\text{Si}_2)$                  | 1.5142983   | 1.5140371   |
| $r(\text{Si}_2-\text{O}_3)$                  | 1.7009711   | 1.7112661   |
| $r(\text{O}_3-\text{Si}_4)$                  | 1.6660867   | 1.6670067   |
| $\angle(\text{Si}_2-\text{O}_1-\text{O}_3)$  | 125.7978085 | 125.4553449 |
| $\angle(\text{O}_3-\text{Si}_2-\text{Si}_4)$ | 85.1391323  | 85.1896935  |

Table S71:  $^{28}\text{Si}(^{16}\text{O})^{16}\text{O}^{29}\text{Si}$  Fermi Resonances

|                                 |
|---------------------------------|
| $2\nu_3=\nu_5+\nu_2=\nu_1$      |
| $\nu_4+\nu_3=\nu_5+\nu_3=\nu_2$ |
| $2\nu_5=\nu_3$                  |
| $2\nu_6=\nu_4$                  |

Table S72:  $^{28}\text{Si}(^{16}\text{O})^{16}\text{O}^{30}\text{Si}$  Frequencies and ZPVE

|                           | Description                               | Frequencies [ $\text{cm}^{-1}$ ] |
|---------------------------|-------------------------------------------|----------------------------------|
| $\omega_1$                | $\text{O}_1-\text{Si}_1$ stretch          | 1246.8                           |
| $\omega_2$                | $\text{O}_2-\text{Si}_2$ stretch          | 851.6                            |
| $\omega_3$                | $\text{Si}_1-\text{O}_2$ stretch          | 602.5                            |
| $\omega_4$                | $\text{Si}_1-\text{O}_2-\text{Si}_2$ bend | 437.7                            |
| $\omega_5$                | $\text{O}_1-\text{Si}_1-\text{O}_2$ bend  | 206.3                            |
| $\omega_6$                | out-of-plane bend                         | 166.4                            |
| $\nu_1$                   | $\text{O}_1-\text{Si}_1$ stretch          | 1234.1                           |
| $\nu_2$                   | $\text{O}_2-\text{Si}_2$ stretch          | 849.8                            |
| $\nu_3$                   | $\text{Si}_1-\text{O}_2$ stretch          | 578.9                            |
| $\nu_4$                   | $\text{Si}_1-\text{O}_2-\text{Si}_2$ bend | 429.8                            |
| $\nu_5$                   | $\text{O}_1-\text{Si}_1-\text{O}_2$ bend  | 203.3                            |
| $\nu_6$                   | out-of-plane bend                         | 165.7                            |
| ZPVE [ $\text{cm}^{-1}$ ] |                                           | 1746.5                           |

Table S73:  $^{28}\text{Si}(^{16}\text{O})^{16}\text{O}^{30}\text{Si}$  Rotational Constants [MHz]

|          |          |
|----------|----------|
| $A_e$    | 26192.0  |
| $B_e$    | 2984.1   |
| $C_e$    | 2678.9   |
| $A_0$    | 26164.1  |
| $B_0$    | 2971.5   |
| $C_0$    | 2666.3   |
| $\kappa$ | -0.97402 |
| $A_1$    | 26203.0  |
| $B_1$    | 2960.7   |
| $C_1$    | 2658.1   |
| $A_2$    | 26009.5  |
| $B_2$    | 2970.7   |
| $C_2$    | 2665.0   |
| $A_3$    | 25975.0  |
| $B_3$    | 2963.2   |
| $C_3$    | 2653.5   |
| $A_4$    | 26372.1  |
| $B_4$    | 2963.0   |
| $C_4$    | 2660.1   |
| $A_5$    | 26219.2  |
| $B_5$    | 2973.8   |
| $C_5$    | 2664.5   |
| $A_6$    | 26150.4  |
| $B_6$    | 2972.5   |
| $C_6$    | 2671.6   |

Table S74:  $^{28}\text{Si}(^{16}\text{O})^{16}\text{O}^{30}\text{Si}$  Quartic and Sextic Distortion Constants

| Constant      | Units |          |
|---------------|-------|----------|
| $\Delta_J$    | Hz    | 453.245  |
| $\Delta_K$    | kHz   | 206.769  |
| $\Delta_{JK}$ | kHz   | -1.672   |
| $\delta_J$    | Hz    | 65.542   |
| $\delta_K$    | kHz   | 3.673    |
| $\Phi_J$      | uHz   | -80.282  |
| $\Phi_K$      | Hz    | 3.597    |
| $\Phi_{JK}$   | mHz   | 13.659   |
| $\Phi_{KJ}$   | mHz   | -485.144 |
| $\phi_j$      | uHz   | -10.947  |
| $\phi_{jk}$   | mHz   | 2.173    |
| $\phi_k$      | mHz   | 549.076  |

Table S75:  $^{28}\text{Si}(^{16}\text{O})^{16}\text{O}^{30}\text{Si}$  Geometry [ $\text{\AA}$  or Deg]

| Coordinate                                   | $r_e$       | $r_0$       |
|----------------------------------------------|-------------|-------------|
| $r(\text{O}_1-\text{Si}_2)$                  | 1.5142983   | 1.5140137   |
| $r(\text{Si}_2-\text{O}_3)$                  | 1.7009711   | 1.7112720   |
| $r(\text{O}_3-\text{Si}_4)$                  | 1.6660867   | 1.6669844   |
| $\angle(\text{Si}_2-\text{O}_1-\text{O}_3)$  | 125.7978085 | 125.4554615 |
| $\angle(\text{O}_3-\text{Si}_2-\text{Si}_4)$ | 85.1391323  | 85.1894376  |

Table S76:  $^{28}\text{Si}(^{16}\text{O})^{16}\text{O}^{30}\text{Si}$  Fermi Resonances

|                                 |
|---------------------------------|
| $2\nu_3=\nu_5+\nu_2=\nu_1$      |
| $\nu_4+\nu_3=\nu_5+\nu_3=\nu_2$ |
| $2\nu_5=\nu_3$                  |
| $2\nu_6=\nu_4$                  |

Table S77:  $^{28}\text{Si}(^{16}\text{O})^{18}\text{O}^{28}\text{Si}$  Frequencies and ZPVE

|                           | Description                                 | Frequencies [ $\text{cm}^{-1}$ ] |
|---------------------------|---------------------------------------------|----------------------------------|
| $\omega_1$                | $\text{O}_1\text{--Si}_1$ stretch           | 1246.7                           |
| $\omega_2$                | $\text{O}_2\text{--Si}_2$ stretch           | 828.8                            |
| $\omega_3$                | $\text{Si}_1\text{--O}_2$ stretch           | 580.3                            |
| $\omega_4$                | $\text{Si}_1\text{--O}_2\text{--Si}_2$ bend | 441.0                            |
| $\omega_5$                | $\text{O}_1\text{--Si}_1\text{--O}_2$ bend  | 206.4                            |
| $\omega_6$                | out-of-plane bend                           | 166.9                            |
| $\nu_1$                   | $\text{O}_1\text{--Si}_1$ stretch           | 1232.9                           |
| $\nu_2$                   | $\text{O}_2\text{--Si}_2$ stretch           | 826.7                            |
| $\nu_3$                   | $\text{Si}_1\text{--O}_2$ stretch           | 558.1                            |
| $\nu_4$                   | $\text{Si}_1\text{--O}_2\text{--Si}_2$ bend | 432.8                            |
| $\nu_5$                   | $\text{O}_1\text{--Si}_1\text{--O}_2$ bend  | 203.5                            |
| $\nu_6$                   | out-of-plane bend                           | 166.2                            |
| ZPVE [ $\text{cm}^{-1}$ ] |                                             | 1726.3                           |

Table S78:  $^{28}\text{Si}(^{16}\text{O})^{18}\text{O}^{28}\text{Si}$  Rotational Constants [MHz]

|          |          |
|----------|----------|
| $A_e$    | 24115.3  |
| $B_e$    | 3065.7   |
| $C_e$    | 2720.0   |
| $A_0$    | 24096.9  |
| $B_0$    | 3053.1   |
| $C_0$    | 2707.4   |
| $\kappa$ | -0.96768 |
| $A_1$    | 24133.3  |
| $B_1$    | 3041.9   |
| $C_1$    | 2699.2   |
| $A_2$    | 23942.8  |
| $B_2$    | 3052.7   |
| $C_2$    | 2706.2   |
| $A_3$    | 23947.7  |
| $B_3$    | 3044.1   |
| $C_3$    | 2694.3   |
| $A_4$    | 24284.9  |
| $B_4$    | 3044.4   |
| $C_4$    | 2701.3   |
| $A_5$    | 24149.7  |
| $B_5$    | 3055.8   |
| $C_5$    | 2705.7   |
| $A_6$    | 24086.2  |
| $B_6$    | 3053.9   |
| $C_6$    | 2712.8   |

Table S79:  $^{28}\text{Si}(^{16}\text{O})^{18}\text{O}^{28}\text{Si}$  Quartic and Sextic Distortion Constants

| Constant      | Units |          |
|---------------|-------|----------|
| $\Delta_J$    | Hz    | 464.875  |
| $\Delta_K$    | kHz   | 173.095  |
| $\Delta_{JK}$ | kHz   | -0.486   |
| $\delta_J$    | Hz    | 72.651   |
| $\delta_K$    | kHz   | 3.792    |
| $\Phi_J$      | uHz   | -82.136  |
| $\Phi_K$      | Hz    | 3.040    |
| $\Phi_{JK}$   | mHz   | 13.863   |
| $\Phi_{KJ}$   | mHz   | -434.923 |
| $\phi_j$      | uHz   | -14.181  |
| $\phi_{jk}$   | mHz   | 2.511    |
| $\phi_k$      | mHz   | 490.249  |

Table S80:  $^{28}\text{Si}(^{16}\text{O})^{18}\text{O}^{28}\text{Si}$  Geometry [ $\text{\AA}$  or Deg]

| Coordinate                                   | $r_e$       | $r_0$       |
|----------------------------------------------|-------------|-------------|
| $r(\text{O}_1-\text{Si}_2)$                  | 1.5142983   | 1.5140582   |
| $r(\text{Si}_2-\text{O}_3)$                  | 1.7009711   | 1.7109596   |
| $r(\text{O}_3-\text{Si}_4)$                  | 1.6660867   | 1.6669218   |
| $\angle(\text{Si}_2-\text{O}_1-\text{O}_3)$  | 125.7978085 | 125.4581576 |
| $\angle(\text{O}_3-\text{Si}_2-\text{Si}_4)$ | 85.1391323  | 85.1973788  |

Table S81:  $^{28}\text{Si}(^{16}\text{O})^{18}\text{O}^{28}\text{Si}$  Fermi Resonances

|                                 |
|---------------------------------|
| $2\nu_3=\nu_3+\nu_2=\nu_1$      |
| $\nu_4+\nu_3=\nu_5+\nu_3=\nu_2$ |
| $2\nu_5=\nu_3$                  |
| $2\nu_6=\nu_4$                  |

Table S82:  $^{28}\text{Si}(^{18}\text{O})^{16}\text{O}^{28}\text{Si}$  Frequencies and ZPVE

|                           | Description                               | Frequencies [ $\text{cm}^{-1}$ ] |
|---------------------------|-------------------------------------------|----------------------------------|
| $\omega_1$                | $\text{O}_1-\text{Si}_1$ stretch          | 1207.2                           |
| $\omega_2$                | $\text{O}_2-\text{Si}_2$ stretch          | 858.3                            |
| $\omega_3$                | $\text{Si}_1-\text{O}_2$ stretch          | 603.7                            |
| $\omega_4$                | $\text{Si}_1-\text{O}_2-\text{Si}_2$ bend | 437.2                            |
| $\omega_5$                | $\text{O}_1-\text{Si}_1-\text{O}_2$ bend  | 203.2                            |
| $\omega_6$                | out-of-plane bend                         | 163.6                            |
| $\nu_1$                   | $\text{O}_1-\text{Si}_1$ stretch          | 1198.6                           |
| $\nu_2$                   | $\text{O}_2-\text{Si}_2$ stretch          | 855.2                            |
| $\nu_3$                   | $\text{Si}_1-\text{O}_2$ stretch          | 580.2                            |
| $\nu_4$                   | $\text{Si}_1-\text{O}_2-\text{Si}_2$ bend | 429.1                            |
| $\nu_5$                   | $\text{O}_1-\text{Si}_1-\text{O}_2$ bend  | 200.3                            |
| $\nu_6$                   | out-of-plane bend                         | 163.0                            |
| ZPVE [ $\text{cm}^{-1}$ ] |                                           | 1727.8                           |

Table S83:  $^{28}\text{Si}(^{18}\text{O})^{16}\text{O}^{28}\text{Si}$  Rotational Constants [MHz]

|          |          |
|----------|----------|
| $A_e$    | 26417.7  |
| $B_e$    | 2913.1   |
| $C_e$    | 2623.8   |
| $A_0$    | 26386.3  |
| $B_0$    | 2901.0   |
| $C_0$    | 2611.6   |
| $\kappa$ | -0.97566 |
| $A_1$    | 26424.1  |
| $B_1$    | 2890.2   |
| $C_1$    | 2603.4   |
| $A_2$    | 26224.6  |
| $B_2$    | 2900.5   |
| $C_2$    | 2610.5   |
| $A_3$    | 26207.0  |
| $B_3$    | 2892.6   |
| $C_3$    | 2599.0   |
| $A_4$    | 26587.2  |
| $B_4$    | 2893.0   |
| $C_4$    | 2605.6   |
| $A_5$    | 26438.8  |
| $B_5$    | 2903.7   |
| $C_5$    | 2610.2   |
| $A_6$    | 26373.4  |
| $B_6$    | 2902.2   |
| $C_6$    | 2617.0   |

Table S84:  $^{28}\text{Si}(^{18}\text{O})^{16}\text{O}^{28}\text{Si}$  Quartic and Sextic Distortion Constants

| Constant      | Units |          |
|---------------|-------|----------|
| $\Delta_J$    | Hz    | 418.418  |
| $\Delta_K$    | kHz   | 204.919  |
| $\Delta_{JK}$ | kHz   | -1.018   |
| $\delta_J$    | Hz    | 58.072   |
| $\delta_K$    | kHz   | 3.619    |
| $\Phi_J$      | uHz   | -67.171  |
| $\Phi_K$      | Hz    | 3.608    |
| $\Phi_{JK}$   | mHz   | 13.259   |
| $\Phi_{KJ}$   | mHz   | -494.018 |
| $\phi_j$      | uHz   | -9.349   |
| $\phi_{jk}$   | mHz   | 2.502    |
| $\phi_k$      | mHz   | 542.068  |

Table S85:  $^{28}\text{Si}(^{18}\text{O})^{16}\text{O}^{28}\text{Si}$  Geometry [ $\text{\AA}$  or Deg]

| Coordinate                                   | $r_e$       | $r_0$       |
|----------------------------------------------|-------------|-------------|
| $r(\text{O}_1-\text{Si}_2)$                  | 1.5142983   | 1.5141699   |
| $r(\text{Si}_2-\text{O}_3)$                  | 1.7009711   | 1.7111853   |
| $r(\text{O}_3-\text{Si}_4)$                  | 1.6660867   | 1.6670135   |
| $\angle(\text{Si}_2-\text{O}_1-\text{O}_3)$  | 125.7978085 | 125.4561284 |
| $\angle(\text{O}_3-\text{Si}_2-\text{Si}_4)$ | 85.1391323  | 85.1861714  |

Table S86:  $^{28}\text{Si}(^{18}\text{O})^{16}\text{O}^{28}\text{Si}$  Fermi Resonances

|                                 |
|---------------------------------|
| $2\nu_3=\nu_5+\nu_2=\nu_1$      |
| $\nu_4+\nu_3=\nu_5+\nu_3=\nu_2$ |
| $2\nu_5=\nu_3$                  |
| $2\nu_6=\nu_4$                  |

Table S87:  $^{28}\text{Si}(^{18}\text{O})^{18}\text{O}^{28}\text{Si}$  Frequencies and ZPVE

|                           | Description                               | Frequencies [ $\text{cm}^{-1}$ ] |
|---------------------------|-------------------------------------------|----------------------------------|
| $\omega_1$                | $\text{O}_1-\text{Si}_1$ stretch          | 1206.8                           |
| $\omega_2$                | $\text{O}_2-\text{Si}_2$ stretch          | 827.6                            |
| $\omega_3$                | $\text{Si}_1-\text{O}_2$ stretch          | 579.4                            |
| $\omega_4$                | $\text{Si}_1-\text{O}_2-\text{Si}_2$ bend | 434.3                            |
| $\omega_5$                | $\text{O}_1-\text{Si}_1-\text{O}_2$ bend  | 202.2                            |
| $\omega_6$                | out-of-plane bend                         | 163.5                            |
| $\nu_1$                   | $\text{O}_1-\text{Si}_1$ stretch          | 1195.2                           |
| $\nu_2$                   | $\text{O}_2-\text{Si}_2$ stretch          | 824.9                            |
| $\nu_3$                   | $\text{Si}_1-\text{O}_2$ stretch          | 557.4                            |
| $\nu_4$                   | $\text{Si}_1-\text{O}_2-\text{Si}_2$ bend | 426.2                            |
| $\nu_5$                   | $\text{O}_1-\text{Si}_1-\text{O}_2$ bend  | 199.3                            |
| $\nu_6$                   | out-of-plane bend                         | 162.8                            |
| ZPVE [ $\text{cm}^{-1}$ ] |                                           | 1698.4                           |

Table S88:  $^{28}\text{Si}(^{18}\text{O})^{18}\text{O}^{28}\text{Si}$  Rotational Constants [MHz]

|          |          |
|----------|----------|
| $A_e$    | 24113.8  |
| $B_e$    | 2902.0   |
| $C_e$    | 2590.5   |
| $A_0$    | 24095.1  |
| $B_0$    | 2890.4   |
| $C_0$    | 2578.7   |
| $\kappa$ | -0.97103 |
| $A_1$    | 24132.7  |
| $B_1$    | 2879.7   |
| $C_1$    | 2570.8   |
| $A_2$    | 23940.3  |
| $B_2$    | 2890.1   |
| $C_2$    | 2577.5   |
| $A_3$    | 23950.8  |
| $B_3$    | 2882.0   |
| $C_3$    | 2566.5   |
| $A_4$    | 24277.3  |
| $B_4$    | 2882.6   |
| $C_4$    | 2573.1   |
| $A_5$    | 24147.8  |
| $B_5$    | 2893.2   |
| $C_5$    | 2577.3   |
| $A_6$    | 24084.1  |
| $B_6$    | 2891.5   |
| $C_6$    | 2584.0   |

Table S89:  $^{28}\text{Si}(^{18}\text{O})^{18}\text{O}^{28}\text{Si}$  Quartic and Sextic Distortion Constants

| Constant      | Units |          |
|---------------|-------|----------|
| $\Delta_J$    | Hz    | 408.796  |
| $\Delta_K$    | kHz   | 173.490  |
| $\Delta_{JK}$ | kHz   | -0.279   |
| $\delta_J$    | Hz    | 60.709   |
| $\delta_K$    | kHz   | 3.528    |
| $\Phi_J$      | uHz   | -63.524  |
| $\Phi_K$      | Hz    | 2.966    |
| $\Phi_{JK}$   | mHz   | 12.610   |
| $\Phi_{KJ}$   | mHz   | -420.109 |
| $\phi_j$      | uHz   | -10.809  |
| $\phi_{jk}$   | mHz   | 2.507    |
| $\phi_k$      | mHz   | 473.723  |

Table S90:  $^{28}\text{Si}(^{18}\text{O})^{18}\text{O}^{28}\text{Si}$  Geometry [ $\text{\AA}$  or Deg]

| Coordinate                                   | $r_e$       | $r_0$       |
|----------------------------------------------|-------------|-------------|
| $r(\text{O}_1-\text{Si}_2)$                  | 1.5142983   | 1.5141664   |
| $r(\text{Si}_2-\text{O}_3)$                  | 1.7009711   | 1.7108837   |
| $r(\text{O}_3-\text{Si}_4)$                  | 1.6660867   | 1.6669062   |
| $\angle(\text{Si}_2-\text{O}_1-\text{O}_3)$  | 125.7978085 | 125.4590691 |
| $\angle(\text{O}_3-\text{Si}_2-\text{Si}_4)$ | 85.1391323  | 85.1935991  |

Table S91:  $^{28}\text{Si}(^{18}\text{O})^{18}\text{O}^{28}\text{Si}$  Fermi Resonances

|                                 |
|---------------------------------|
| $2\nu_3=\nu_5+\nu_2=\nu_1$      |
| $\nu_4+\nu_3=\nu_5+\nu_3=\nu_2$ |
| $2\nu_5=\nu_3$                  |
| $2\nu_6=\nu_4$                  |



Table S92:  $^{29}\text{Si}(^{16}\text{O})^{16}\text{O}^{28}\text{Si}$  Frequencies and ZPVE

|                           | Description                                 | Frequencies [ $\text{cm}^{-1}$ ] |
|---------------------------|---------------------------------------------|----------------------------------|
| $\omega_1$                | $\text{O}_1\text{--Si}_1$ stretch           | 1237.9                           |
| $\omega_2$                | $\text{O}_2\text{--Si}_2$ stretch           | 858.5                            |
| $\omega_3$                | $\text{Si}_1\text{--O}_2$ stretch           | 603.0                            |
| $\omega_4$                | $\text{Si}_1\text{--O}_2\text{--Si}_2$ bend | 441.8                            |
| $\omega_5$                | $\text{O}_1\text{--Si}_1\text{--O}_2$ bend  | 206.0                            |
| $\omega_6$                | out-of-plane bend                           | 165.5                            |
| $\nu_1$                   | $\text{O}_1\text{--Si}_1$ stretch           | 1225.8                           |
| $\nu_2$                   | $\text{O}_2\text{--Si}_2$ stretch           | 855.8                            |
| $\nu_3$                   | $\text{Si}_1\text{--O}_2$ stretch           | 579.5                            |
| $\nu_4$                   | $\text{Si}_1\text{--O}_2\text{--Si}_2$ bend | 433.7                            |
| $\nu_5$                   | $\text{O}_1\text{--Si}_1\text{--O}_2$ bend  | 203.1                            |
| $\nu_6$                   | out-of-plane bend                           | 164.9                            |
| ZPVE [ $\text{cm}^{-1}$ ] |                                             | 1747.4                           |

Table S93:  $^{29}\text{Si}(^{16}\text{O})^{16}\text{O}^{28}\text{Si}$  Rotational Constants [MHz]

|          |          |
|----------|----------|
| $A_e$    | 26336.2  |
| $B_e$    | 3067.8   |
| $C_e$    | 2747.6   |
| $A_0$    | 26301.5  |
| $B_0$    | 3054.7   |
| $C_0$    | 2734.6   |
| $\kappa$ | -0.97284 |
| $A_1$    | 26335.3  |
| $B_1$    | 3043.7   |
| $C_1$    | 2726.3   |
| $A_2$    | 26143.4  |
| $B_2$    | 3054.2   |
| $C_2$    | 2733.5   |
| $A_3$    | 26117.3  |
| $B_3$    | 3045.7   |
| $C_3$    | 2721.0   |
| $A_4$    | 26504.4  |
| $B_4$    | 3045.9   |
| $C_4$    | 2728.1   |
| $A_5$    | 26350.1  |
| $B_5$    | 3057.3   |
| $C_5$    | 2732.7   |
| $A_6$    | 26289.3  |
| $B_6$    | 3055.5   |
| $C_6$    | 2740.0   |

Table S94:  $^{29}\text{Si}(^{16}\text{O})^{16}\text{O}^{28}\text{Si}$  Quartic and Sextic Distortion Constants

| Constant      | Units |          |
|---------------|-------|----------|
| $\Delta_J$    | Hz    | 475.674  |
| $\Delta_K$    | kHz   | 199.357  |
| $\Delta_{JK}$ | kHz   | -1.281   |
| $\delta_J$    | Hz    | 69.319   |
| $\delta_K$    | kHz   | 3.860    |
| $\Phi_J$      | uHz   | -87.760  |
| $\Phi_K$      | Hz    | 3.636    |
| $\Phi_{JK}$   | mHz   | 14.166   |
| $\Phi_{KJ}$   | mHz   | -499.502 |
| $\phi_j$      | uHz   | -11.995  |
| $\phi_{jk}$   | mHz   | 2.397    |
| $\phi_k$      | mHz   | 540.053  |

Table S95:  $^{29}\text{Si}(^{16}\text{O})^{16}\text{O}^{28}\text{Si}$  Geometry [ $\text{\AA}$  or Deg]

| Coordinate                                   | $r_e$       | $r_0$       |
|----------------------------------------------|-------------|-------------|
| $r(\text{O}_1-\text{Si}_2)$                  | 1.5142983   | 1.5140580   |
| $r(\text{Si}_2-\text{O}_3)$                  | 1.7009711   | 1.7111886   |
| $r(\text{O}_3-\text{Si}_4)$                  | 1.6660867   | 1.6670751   |
| $\angle(\text{Si}_2-\text{O}_1-\text{O}_3)$  | 125.7978085 | 125.4598827 |
| $\angle(\text{O}_3-\text{Si}_2-\text{Si}_4)$ | 85.1391323  | 85.1882112  |

Table S96:  $^{29}\text{Si}(^{16}\text{O})^{16}\text{O}^{28}\text{Si}$  Fermi Resonances

|                                 |
|---------------------------------|
| $2\nu_3=\nu_5+\nu_2=\nu_1$      |
| $\nu_4+\nu_3=\nu_5+\nu_3=\nu_2$ |
| $2\nu_5=\nu_3$                  |
| $2\nu_6=\nu_4$                  |

Table S97:  $^{30}\text{Si}(^{16}\text{O})^{16}\text{O}^{28}\text{Si}$  Frequencies and ZPVE

|                           | Description                               | Frequencies [ $\text{cm}^{-1}$ ] |
|---------------------------|-------------------------------------------|----------------------------------|
| $\omega_1$                | $\text{O}_1-\text{Si}_1$ stretch          | 1229.3                           |
| $\omega_2$                | $\text{O}_2-\text{Si}_2$ stretch          | 857.6                            |
| $\omega_3$                | $\text{Si}_1-\text{O}_2$ stretch          | 601.5                            |
| $\omega_4$                | $\text{Si}_1-\text{O}_2-\text{Si}_2$ bend | 440.0                            |
| $\omega_5$                | $\text{O}_1-\text{Si}_1-\text{O}_2$ bend  | 204.7                            |
| $\omega_6$                | out-of-plane bend                         | 164.1                            |
| $\nu_1$                   | $\text{O}_1-\text{Si}_1$ stretch          | 1217.6                           |
| $\nu_2$                   | $\text{O}_2-\text{Si}_2$ stretch          | 854.7                            |
| $\nu_3$                   | $\text{Si}_1-\text{O}_2$ stretch          | 578.2                            |
| $\nu_4$                   | $\text{Si}_1-\text{O}_2-\text{Si}_2$ bend | 431.9                            |
| $\nu_5$                   | $\text{O}_1-\text{Si}_1-\text{O}_2$ bend  | 201.8                            |
| $\nu_6$                   | out-of-plane bend                         | 163.6                            |
| ZPVE [ $\text{cm}^{-1}$ ] |                                           | 1739.8                           |

Table S98:  $^{30}\text{Si}(^{16}\text{O})^{16}\text{O}^{28}\text{Si}$  Rotational Constants [MHz]

|          |          |
|----------|----------|
| $A_e$    | 26256.7  |
| $B_e$    | 3059.7   |
| $C_e$    | 2740.4   |
| $A_0$    | 26218.5  |
| $B_0$    | 3046.7   |
| $C_0$    | 2727.3   |
| $\kappa$ | -0.97281 |
| $A_1$    | 26249.4  |
| $B_1$    | 3036.0   |
| $C_1$    | 2719.2   |
| $A_2$    | 26063.7  |
| $B_2$    | 3046.4   |
| $C_2$    | 2726.4   |
| $A_3$    | 26034.0  |
| $B_3$    | 3037.6   |
| $C_3$    | 2713.7   |
| $A_4$    | 26417.5  |
| $B_4$    | 3037.9   |
| $C_4$    | 2720.8   |
| $A_5$    | 26263.3  |
| $B_5$    | 3049.2   |
| $C_5$    | 2725.4   |
| $A_6$    | 26206.7  |
| $B_6$    | 3047.4   |
| $C_6$    | 2732.7   |

Table S99:  $^{30}\text{Si}(^{16}\text{O})^{16}\text{O}^{28}\text{Si}$  Quartic and Sextic Distortion Constants

| Constant      | Units |          |
|---------------|-------|----------|
| $\Delta_J$    | Hz    | 475.572  |
| $\Delta_K$    | kHz   | 194.545  |
| $\Delta_{JK}$ | kHz   | -1.292   |
| $\delta_J$    | Hz    | 69.171   |
| $\delta_K$    | kHz   | 3.823    |
| $\Phi_J$      | uHz   | -89.214  |
| $\Phi_K$      | Hz    | 3.574    |
| $\Phi_{JK}$   | mHz   | 13.751   |
| $\Phi_{KJ}$   | mHz   | -488.989 |
| $\phi_j$      | uHz   | -11.752  |
| $\phi_{jk}$   | mHz   | 2.300    |
| $\phi_k$      | mHz   | 518.869  |

Table S100:  $^{30}\text{Si}(^{16}\text{O})^{16}\text{O}^{28}\text{Si}$  Geometry [ $\text{\AA}$  or Deg]

| Coordinate                                   | $r_e$       | $r_0$       |
|----------------------------------------------|-------------|-------------|
| $r(\text{O}_1-\text{Si}_2)$                  | 1.5142983   | 1.5140543   |
| $r(\text{Si}_2-\text{O}_3)$                  | 1.7009711   | 1.7111213   |
| $r(\text{O}_3-\text{Si}_4)$                  | 1.6660867   | 1.6671173   |
| $\angle(\text{Si}_2-\text{O}_1-\text{O}_3)$  | 125.7978085 | 125.4642794 |
| $\angle(\text{O}_3-\text{Si}_2-\text{Si}_4)$ | 85.1391323  | 85.1865688  |

Table S101:  $^{30}\text{Si}(^{16}\text{O})^{16}\text{O}^{28}\text{Si}$  Fermi Resonances

$$\begin{array}{c}
2\nu_3=\nu_5+\nu_2=\nu_1 \\
\nu_4+\nu_3=\nu_5+\nu_3=\nu_2 \\
2\nu_5=\nu_3 \\
2\nu_6=\nu_4
\end{array}$$

Table S102:  $\text{c-Si}_2\text{O}_2$  Geometry [ $\text{\AA}$  or Deg]

| Coordinate                                  | $r_e$      | $r_0$      |
|---------------------------------------------|------------|------------|
| $r(\text{O}_1-\text{Si}_2)$                 | 1.6867196  | 1.6915087  |
| $r(\text{O}_1-\text{Si}_3)$                 | 1.6867196  | 1.6915087  |
| $r(\text{O}_1-\text{O}_4)$                  | 2.3335636  | 2.3411308  |
| $\angle(\text{O}_1-\text{O}_4-\text{Si}_2)$ | 46.2315078 | 46.2093635 |
| $\angle(\text{O}_1-\text{O}_4-\text{Si}_3)$ | 46.2315078 | 46.2093635 |

Table S103:  $\text{c-Si}_2\text{O}_2$  Fermi Resonances

$$2\nu_6=\nu_5$$

Table S104:  $\text{c-}^{28}\text{Si}^{28}\text{Si}^{16}\text{O}^{18}\text{O}$  Frequencies and ZPVE

|                           | Description                                                                                                                                                                 | Frequencies [ $\text{cm}^{-1}$ ] |
|---------------------------|-----------------------------------------------------------------------------------------------------------------------------------------------------------------------------|----------------------------------|
| $\omega_1$                | $(\text{O}_1-\text{O}_2 \text{ stretch}) + (\text{Si}_1-\text{Si}_2 \text{ stretch})$                                                                                       | 846.4                            |
| $\omega_2$                | $(\text{O}_1-\text{Si}_1 \text{ stretch}) - (\text{O}_1-\text{Si}_2 \text{ stretch}) + (\text{Si}_1-\text{O}_2 \text{ stretch}) - (\text{Si}_2-\text{O}_2 \text{ stretch})$ | 813.9                            |
| $\omega_3$                | $(\text{O}_1-\text{Si}_1 \text{ stretch}) + (\text{O}_1-\text{Si}_2 \text{ stretch}) - (\text{Si}_1-\text{O}_2 \text{ stretch}) - (\text{Si}_2-\text{O}_2 \text{ stretch})$ | 768.3                            |
| $\omega_4$                | $(\text{O}_1-\text{Si}_1 \text{ stretch}) - (\text{O}_1-\text{Si}_2 \text{ stretch}) - (\text{Si}_1-\text{O}_2 \text{ stretch}) + (\text{Si}_2-\text{O}_2 \text{ stretch})$ | 566.6                            |
| $\omega_5$                | $(\text{O}_1-\text{O}_2 \text{ stretch}) - (\text{Si}_1-\text{Si}_2 \text{ stretch})$                                                                                       | 556.9                            |
| $\omega_6$                | out-of-plane bend                                                                                                                                                           | 233.1                            |
| $\nu_1$                   | $(\text{O}_1-\text{O}_2 \text{ stretch}) + (\text{Si}_1-\text{Si}_2 \text{ stretch})$                                                                                       | 832.8                            |
| $\nu_2$                   | $(\text{O}_1-\text{Si}_1 \text{ stretch}) - (\text{O}_1-\text{Si}_2 \text{ stretch}) + (\text{Si}_1-\text{O}_2 \text{ stretch}) - (\text{Si}_2-\text{O}_2 \text{ stretch})$ | 800.6                            |
| $\nu_3$                   | $(\text{O}_1-\text{Si}_1 \text{ stretch}) + (\text{O}_1-\text{Si}_2 \text{ stretch}) - (\text{Si}_1-\text{O}_2 \text{ stretch}) - (\text{Si}_2-\text{O}_2 \text{ stretch})$ | 757.4                            |
| $\nu_4$                   | $(\text{O}_1-\text{Si}_1 \text{ stretch}) - (\text{O}_1-\text{Si}_2 \text{ stretch}) - (\text{Si}_1-\text{O}_2 \text{ stretch}) + (\text{Si}_2-\text{O}_2 \text{ stretch})$ | 553.4                            |
| $\nu_5$                   | $(\text{O}_1-\text{O}_2 \text{ stretch}) - (\text{Si}_1-\text{Si}_2 \text{ stretch})$                                                                                       | 553.8                            |
| $\nu_6$                   | out-of-plane bend                                                                                                                                                           | 236.5                            |
| ZPVE [ $\text{cm}^{-1}$ ] |                                                                                                                                                                             | 1887.6                           |

Table S105: c-<sup>28</sup>Si<sup>28</sup>Si<sup>16</sup>O<sup>18</sup>O Rotational Constants [MHz]

|          |          |
|----------|----------|
| $A_e$    | 10934.6  |
| $B_e$    | 6087.9   |
| $C_e$    | 3910.5   |
| $A_0$    | 10882.5  |
| $B_0$    | 6066.3   |
| $C_0$    | 3891.4   |
| $\kappa$ | -0.37782 |
| $A_1$    | 10859.2  |
| $B_1$    | 6056.6   |
| $C_1$    | 3888.5   |
| $A_2$    | 10844.7  |
| $B_2$    | 6064.4   |
| $C_2$    | 3877.8   |
| $A_3$    | 10897.0  |
| $B_3$    | 6047.0   |
| $C_3$    | 3881.1   |
| $A_4$    | 10855.1  |
| $B_4$    | 6051.5   |
| $C_4$    | 3875.3   |
| $A_5$    | 10886.0  |
| $B_5$    | 6071.0   |
| $C_5$    | 3889.1   |
| $A_6$    | 10848.9  |
| $B_6$    | 6064.3   |
| $C_6$    | 3898.4   |

Table S106: c-<sup>28</sup>Si<sup>28</sup>Si<sup>16</sup>O<sup>18</sup>O Quartic and Sextic Distortion Constants

| Constant      | Units |         |
|---------------|-------|---------|
| $\Delta_J$    | kHz   | 1.602   |
| $\Delta_K$    | kHz   | 7.412   |
| $\Delta_{JK}$ | kHz   | 1.979   |
| $\delta_J$    | Hz    | 578.205 |
| $\delta_K$    | kHz   | 3.697   |
| $\Phi_J$      | mHz   | 1.316   |
| $\Phi_K$      | mHz   | 50.480  |
| $\Phi_{JK}$   | mHz   | -8.078  |
| $\Phi_{KJ}$   | mHz   | -24.066 |
| $\phi_j$      | uHz   | 651.299 |
| $\phi_{jk}$   | mHz   | -1.699  |
| $\phi_k$      | mHz   | 29.735  |

Table S107: c-<sup>28</sup>Si<sup>28</sup>Si<sup>16</sup>O<sup>18</sup>O Geometry [Å or Deg]

| Coordinate                                                  | $r_e$      | $r_0$      |
|-------------------------------------------------------------|------------|------------|
| r(O <sub>1</sub> –Si <sub>2</sub> )                         | 1.6867196  | 1.6914498  |
| r(O <sub>1</sub> –Si <sub>3</sub> )                         | 1.6867196  | 1.6914498  |
| r(O <sub>1</sub> –O <sub>4</sub> )                          | 2.3335636  | 2.3409727  |
| $\angle$ (O <sub>1</sub> –O <sub>4</sub> –Si <sub>2</sub> ) | 46.2315078 | 46.2093800 |
| $\angle$ (O <sub>1</sub> –O <sub>4</sub> –Si <sub>3</sub> ) | 46.2315078 | 46.2093800 |

Table S108: c-<sup>28</sup>Si<sup>28</sup>Si<sup>16</sup>O<sup>18</sup>O Fermi Resonances

$$2\nu_6=\nu_5$$

Table S109: c-<sup>28</sup>Si<sup>28</sup>Si<sup>18</sup>O<sup>18</sup>O Frequencies and ZPVE

|                          | Description                                                                                                                                                                   | Frequencies [cm <sup>-1</sup> ] |
|--------------------------|-------------------------------------------------------------------------------------------------------------------------------------------------------------------------------|---------------------------------|
| $\omega_1$               | (O <sub>1</sub> –O <sub>2</sub> stretch) + (Si <sub>1</sub> –Si <sub>2</sub> stretch)                                                                                         | 824.7                           |
| $\omega_2$               | (O <sub>1</sub> –Si <sub>1</sub> stretch) - (O <sub>1</sub> –Si <sub>2</sub> stretch) + (Si <sub>1</sub> –O <sub>2</sub> stretch) - (Si <sub>2</sub> –O <sub>2</sub> stretch) | 798.2                           |
| $\omega_3$               | (O <sub>1</sub> –Si <sub>1</sub> stretch) + (O <sub>1</sub> –Si <sub>2</sub> stretch) - (Si <sub>1</sub> –O <sub>2</sub> stretch) - (Si <sub>2</sub> –O <sub>2</sub> stretch) | 757.4                           |
| $\omega_4$               | (O <sub>1</sub> –Si <sub>1</sub> stretch) - (O <sub>1</sub> –Si <sub>2</sub> stretch) - (Si <sub>1</sub> –O <sub>2</sub> stretch) + (Si <sub>2</sub> –O <sub>2</sub> stretch) | 556.5                           |
| $\omega_5$               | (O <sub>1</sub> –O <sub>2</sub> stretch) - (Si <sub>1</sub> –Si <sub>2</sub> stretch)                                                                                         | 552.5                           |
| $\omega_6$               | out-of-plane bend                                                                                                                                                             | 228.8                           |
| $\nu_1$                  | (O <sub>1</sub> –O <sub>2</sub> stretch) + (Si <sub>1</sub> –Si <sub>2</sub> stretch)                                                                                         | 811.7                           |
| $\nu_2$                  | (O <sub>1</sub> –Si <sub>1</sub> stretch) - (O <sub>1</sub> –Si <sub>2</sub> stretch) + (Si <sub>1</sub> –O <sub>2</sub> stretch) - (Si <sub>2</sub> –O <sub>2</sub> stretch) | 785.6                           |
| $\nu_3$                  | (O <sub>1</sub> –Si <sub>1</sub> stretch) + (O <sub>1</sub> –Si <sub>2</sub> stretch) - (Si <sub>1</sub> –O <sub>2</sub> stretch) - (Si <sub>2</sub> –O <sub>2</sub> stretch) | 746.8                           |
| $\nu_4$                  | (O <sub>1</sub> –Si <sub>1</sub> stretch) - (O <sub>1</sub> –Si <sub>2</sub> stretch) - (Si <sub>1</sub> –O <sub>2</sub> stretch) + (Si <sub>2</sub> –O <sub>2</sub> stretch) | 543.8                           |
| $\nu_5$                  | (O <sub>1</sub> –O <sub>2</sub> stretch) - (Si <sub>1</sub> –Si <sub>2</sub> stretch)                                                                                         | 549.5                           |
| $\nu_6$                  | out-of-plane bend                                                                                                                                                             | 232.0                           |
| ZPVE [cm <sup>-1</sup> ] |                                                                                                                                                                               | 1854.3                          |

Table S110: c-<sup>28</sup>Si<sup>28</sup>Si<sup>18</sup>O<sup>18</sup>O Rotational Constants [MHz]

|          |          |
|----------|----------|
| $A_e$    | 10312.3  |
| $B_e$    | 6087.9   |
| $C_e$    | 3828.0   |
| $A_0$    | 10264.2  |
| $B_0$    | 6066.7   |
| $C_0$    | 3809.4   |
| $\kappa$ | -0.30060 |
| $A_1$    | 10240.4  |
| $B_1$    | 6057.4   |
| $C_1$    | 3802.9   |
| $A_2$    | 10228.9  |
| $B_2$    | 6065.3   |
| $C_2$    | 3799.9   |
| $A_3$    | 10279.1  |
| $B_3$    | 6047.2   |
| $C_3$    | 3799.4   |
| $A_4$    | 10239.2  |
| $B_4$    | 6052.2   |
| $C_4$    | 3794.1   |
| $A_5$    | 10267.4  |
| $B_5$    | 6071.5   |
| $C_5$    | 3807.1   |
| $A_6$    | 10234.0  |
| $B_6$    | 6064.2   |
| $C_6$    | 3816.1   |

Table S111: c-<sup>28</sup>Si<sup>28</sup>Si<sup>18</sup>O<sup>18</sup>O Quartic and Sextic Distortion Constants

| Constant      | Units |         |
|---------------|-------|---------|
| $\Delta_J$    | kHz   | 1.589   |
| $\Delta_K$    | kHz   | 6.382   |
| $\Delta_{JK}$ | kHz   | 1.788   |
| $\delta_J$    | Hz    | 585.110 |
| $\delta_K$    | kHz   | 3.420   |
| $\Phi_J$      | mHz   | 1.314   |
| $\Phi_K$      | mHz   | 43.270  |
| $\Phi_{JK}$   | mHz   | -8.166  |
| $\Phi_{KJ}$   | mHz   | -19.999 |
| $\phi_j$      | uHz   | 652.029 |
| $\phi_{jk}$   | mHz   | -1.904  |
| $\phi_k$      | mHz   | 24.583  |

Table S112: c-<sup>28</sup>Si<sup>28</sup>Si<sup>18</sup>O<sup>18</sup>O Geometry [Å or Deg]

| Coordinate                                          | r <sub>e</sub> | r <sub>0</sub> |
|-----------------------------------------------------|----------------|----------------|
| r(O <sub>1</sub> –Si <sub>2</sub> )                 | 1.6867196      | 1.6913413      |
| r(O <sub>1</sub> –Si <sub>3</sub> )                 | 1.6867196      | 1.6913413      |
| r(O <sub>1</sub> –O <sub>4</sub> )                  | 2.3335636      | 2.3408221      |
| ∠(O <sub>1</sub> –O <sub>4</sub> –Si <sub>2</sub> ) | 46.2315078     | 46.2111774     |
| ∠(O <sub>1</sub> –O <sub>4</sub> –Si <sub>3</sub> ) | 46.2315078     | 46.2111774     |

Table S113: c-<sup>28</sup>Si<sup>28</sup>Si<sup>18</sup>O<sup>18</sup>O Fermi Resonances

$$2\nu_6=\nu_5$$

Table S114: c-<sup>28</sup>Si<sup>29</sup>Si<sup>16</sup>O<sup>16</sup>O Frequencies and ZPVE

|                          | Description                                                                                                                                                                   | Frequencies [cm <sup>-1</sup> ] |
|--------------------------|-------------------------------------------------------------------------------------------------------------------------------------------------------------------------------|---------------------------------|
| $\omega_1$               | (O <sub>1</sub> –O <sub>2</sub> stretch) + (Si <sub>1</sub> –Si <sub>2</sub> stretch)                                                                                         | 859.8                           |
| $\omega_2$               | (O <sub>1</sub> –Si <sub>1</sub> stretch) - (O <sub>1</sub> –Si <sub>2</sub> stretch) + (Si <sub>1</sub> –O <sub>2</sub> stretch) - (Si <sub>2</sub> –O <sub>2</sub> stretch) | 825.4                           |
| $\omega_3$               | (O <sub>1</sub> –Si <sub>1</sub> stretch) + (O <sub>1</sub> –Si <sub>2</sub> stretch) - (Si <sub>1</sub> –O <sub>2</sub> stretch) - (Si <sub>2</sub> –O <sub>2</sub> stretch) | 783.3                           |
| $\omega_4$               | (O <sub>1</sub> –Si <sub>1</sub> stretch) - (O <sub>1</sub> –Si <sub>2</sub> stretch) - (Si <sub>1</sub> –O <sub>2</sub> stretch) + (Si <sub>2</sub> –O <sub>2</sub> stretch) | 576.3                           |
| $\omega_5$               | (O <sub>1</sub> –O <sub>2</sub> stretch) - (Si <sub>1</sub> –Si <sub>2</sub> stretch)                                                                                         | 557.4                           |
| $\omega_6$               | out-of-plane bend                                                                                                                                                             | 236.6                           |
| $\nu_1$                  | (O <sub>1</sub> –O <sub>2</sub> stretch) + (Si <sub>1</sub> –Si <sub>2</sub> stretch)                                                                                         | 845.9                           |
| $\nu_2$                  | (O <sub>1</sub> –Si <sub>1</sub> stretch) - (O <sub>1</sub> –Si <sub>2</sub> stretch) + (Si <sub>1</sub> –O <sub>2</sub> stretch) - (Si <sub>2</sub> –O <sub>2</sub> stretch) | 811.8                           |
| $\nu_3$                  | (O <sub>1</sub> –Si <sub>1</sub> stretch) + (O <sub>1</sub> –Si <sub>2</sub> stretch) - (Si <sub>1</sub> –O <sub>2</sub> stretch) - (Si <sub>2</sub> –O <sub>2</sub> stretch) | 772.1                           |
| $\nu_4$                  | (O <sub>1</sub> –Si <sub>1</sub> stretch) - (O <sub>1</sub> –Si <sub>2</sub> stretch) - (Si <sub>1</sub> –O <sub>2</sub> stretch) + (Si <sub>2</sub> –O <sub>2</sub> stretch) | 562.6                           |
| $\nu_5$                  | (O <sub>1</sub> –O <sub>2</sub> stretch) - (Si <sub>1</sub> –Si <sub>2</sub> stretch)                                                                                         | 554.4                           |
| $\nu_6$                  | out-of-plane bend                                                                                                                                                             | 240.1                           |
| ZPVE [cm <sup>-1</sup> ] |                                                                                                                                                                               | 1914.3                          |

Table S115: c-<sup>28</sup>Si<sup>29</sup>Si<sup>16</sup>O<sup>16</sup>O Rotational Constants [MHz]

|          |          |
|----------|----------|
| $A_e$    | 11604.4  |
| $B_e$    | 5982.1   |
| $C_e$    | 3947.4   |
| $A_0$    | 11547.9  |
| $B_0$    | 5960.7   |
| $C_0$    | 3927.8   |
| $\kappa$ | -0.46643 |
| $A_1$    | 11520.4  |
| $B_1$    | 5951.9   |
| $C_1$    | 3921.6   |
| $A_2$    | 11506.9  |
| $B_2$    | 5958.4   |
| $C_2$    | 3917.8   |
| $A_3$    | 11567.1  |
| $B_3$    | 5940.9   |
| $C_3$    | 3916.8   |
| $A_4$    | 11518.3  |
| $B_4$    | 5945.7   |
| $C_4$    | 3910.9   |
| $A_5$    | 11551.2  |
| $B_5$    | 5965.1   |
| $C_5$    | 3925.5   |
| $A_6$    | 11510.1  |
| $B_6$    | 5959.4   |
| $C_6$    | 3935.0   |

Table S116: c-<sup>28</sup>Si<sup>29</sup>Si<sup>16</sup>O<sup>16</sup>O Quartic and Sextic Distortion Constants

| Constant      | Units |         |
|---------------|-------|---------|
| $\Delta_J$    | kHz   | 1.566   |
| $\Delta_K$    | kHz   | 8.675   |
| $\Delta_{JK}$ | kHz   | 2.117   |
| $\delta_J$    | Hz    | 549.056 |
| $\delta_K$    | kHz   | 3.925   |
| $\Phi_J$      | mHz   | 1.251   |
| $\Phi_K$      | mHz   | 57.776  |
| $\Phi_{JK}$   | mHz   | -7.622  |
| $\Phi_{KJ}$   | mHz   | -28.007 |
| $\phi_j$      | uHz   | 616.809 |
| $\phi_{jk}$   | mHz   | -1.368  |
| $\phi_k$      | mHz   | 35.950  |

Table S117: c-<sup>28</sup>Si<sup>29</sup>Si<sup>16</sup>O<sup>16</sup>O Geometry [Å or Deg]

| Coordinate                                          | r <sub>e</sub> | r <sub>0</sub> |
|-----------------------------------------------------|----------------|----------------|
| r(O <sub>1</sub> –Si <sub>2</sub> )                 | 1.6867196      | 1.6914975      |
| r(O <sub>1</sub> –Si <sub>3</sub> )                 | 1.6867196      | 1.6914876      |
| r(O <sub>1</sub> –O <sub>4</sub> )                  | 2.3335636      | 2.3411121      |
| ∠(O <sub>1</sub> –O <sub>4</sub> –Si <sub>2</sub> ) | 46.2315078     | 46.2094396     |
| ∠(O <sub>1</sub> –O <sub>4</sub> –Si <sub>3</sub> ) | 46.2315078     | 46.2091193     |

Table S118: c-<sup>28</sup>Si<sup>29</sup>Si<sup>16</sup>O<sup>16</sup>O Fermi Resonances

$$2\nu_6=\nu_5$$

Table S119: c-<sup>28</sup>Si<sup>30</sup>Si<sup>16</sup>O<sup>16</sup>O Frequencies and ZPVE

|                          | Description                                                                                                                                                                   | Frequencies [cm <sup>-1</sup> ] |
|--------------------------|-------------------------------------------------------------------------------------------------------------------------------------------------------------------------------|---------------------------------|
| $\omega_1$               | (O <sub>1</sub> –O <sub>2</sub> stretch) + (Si <sub>1</sub> –Si <sub>2</sub> stretch)                                                                                         | 858.5                           |
| $\omega_2$               | (O <sub>1</sub> –Si <sub>1</sub> stretch) - (O <sub>1</sub> –Si <sub>2</sub> stretch) + (Si <sub>1</sub> –O <sub>2</sub> stretch) - (Si <sub>2</sub> –O <sub>2</sub> stretch) | 822.7                           |
| $\omega_3$               | (O <sub>1</sub> –Si <sub>1</sub> stretch) + (O <sub>1</sub> –Si <sub>2</sub> stretch) - (Si <sub>1</sub> –O <sub>2</sub> stretch) - (Si <sub>2</sub> –O <sub>2</sub> stretch) | 781.0                           |
| $\omega_4$               | (O <sub>1</sub> –Si <sub>1</sub> stretch) - (O <sub>1</sub> –Si <sub>2</sub> stretch) - (Si <sub>1</sub> –O <sub>2</sub> stretch) + (Si <sub>2</sub> –O <sub>2</sub> stretch) | 574.6                           |
| $\omega_5$               | (O <sub>1</sub> –O <sub>2</sub> stretch) - (Si <sub>1</sub> –Si <sub>2</sub> stretch)                                                                                         | 553.7                           |
| $\omega_6$               | out-of-plane bend                                                                                                                                                             | 235.9                           |
| $\nu_1$                  | (O <sub>1</sub> –O <sub>2</sub> stretch) + (Si <sub>1</sub> –Si <sub>2</sub> stretch)                                                                                         | 844.7                           |
| $\nu_2$                  | (O <sub>1</sub> –Si <sub>1</sub> stretch) - (O <sub>1</sub> –Si <sub>2</sub> stretch) + (Si <sub>1</sub> –O <sub>2</sub> stretch) - (Si <sub>2</sub> –O <sub>2</sub> stretch) | 809.2                           |
| $\nu_3$                  | (O <sub>1</sub> –Si <sub>1</sub> stretch) + (O <sub>1</sub> –Si <sub>2</sub> stretch) - (Si <sub>1</sub> –O <sub>2</sub> stretch) - (Si <sub>2</sub> –O <sub>2</sub> stretch) | 769.9                           |
| $\nu_4$                  | (O <sub>1</sub> –Si <sub>1</sub> stretch) - (O <sub>1</sub> –Si <sub>2</sub> stretch) - (Si <sub>1</sub> –O <sub>2</sub> stretch) + (Si <sub>2</sub> –O <sub>2</sub> stretch) | 561.0                           |
| $\nu_5$                  | (O <sub>1</sub> –O <sub>2</sub> stretch) - (Si <sub>1</sub> –Si <sub>2</sub> stretch)                                                                                         | 550.7                           |
| $\nu_6$                  | out-of-plane bend                                                                                                                                                             | 239.3                           |
| ZPVE [cm <sup>-1</sup> ] |                                                                                                                                                                               | 1908.2                          |

Table S120: c-<sup>28</sup>Si<sup>30</sup>Si<sup>16</sup>O<sup>16</sup>O Rotational Constants [MHz]

|          |          |
|----------|----------|
| $A_e$    | 11604.4  |
| $B_e$    | 5882.5   |
| $C_e$    | 3903.6   |
| $A_0$    | 11548.0  |
| $B_0$    | 5861.5   |
| $C_0$    | 3884.5   |
| $\kappa$ | -0.48403 |
| $A_1$    | 11520.4  |
| $B_1$    | 5853.1   |
| $C_1$    | 3878.7   |
| $A_2$    | 11507.2  |
| $B_2$    | 5859.1   |
| $C_2$    | 3874.7   |
| $A_3$    | 11567.4  |
| $B_3$    | 5842.2   |
| $C_3$    | 3873.4   |
| $A_4$    | 11518.5  |
| $B_4$    | 5846.8   |
| $C_4$    | 3867.8   |
| $A_5$    | 11551.2  |
| $B_5$    | 5865.8   |
| $C_5$    | 3882.3   |
| $A_6$    | 11510.0  |
| $B_6$    | 5860.4   |
| $C_6$    | 3891.6   |

Table S121: c-<sup>28</sup>Si<sup>30</sup>Si<sup>16</sup>O<sup>16</sup>O Quartic and Sextic Distortion Constants

| Constant      | Units |         |
|---------------|-------|---------|
| $\Delta_J$    | kHz   | 1.519   |
| $\Delta_K$    | kHz   | 8.751   |
| $\Delta_{JK}$ | kHz   | 2.088   |
| $\delta_J$    | Hz    | 528.926 |
| $\delta_K$    | kHz   | 3.872   |
| $\Phi_J$      | mHz   | 1.190   |
| $\Phi_K$      | mHz   | 57.262  |
| $\Phi_{JK}$   | mHz   | -7.246  |
| $\Phi_{KJ}$   | mHz   | -27.808 |
| $\phi_j$      | uHz   | 586.369 |
| $\phi_{jk}$   | mHz   | -1.249  |
| $\phi_k$      | mHz   | 36.010  |

Table S122: c-<sup>28</sup>Si<sup>30</sup>Si<sup>16</sup>O<sup>16</sup>O Geometry [Å or Deg]

| Coordinate                                                  | $r_e$      | $r_0$      |
|-------------------------------------------------------------|------------|------------|
| r(O <sub>1</sub> –Si <sub>2</sub> )                         | 1.6867196  | 1.6914868  |
| r(O <sub>1</sub> –Si <sub>3</sub> )                         | 1.6867196  | 1.6914677  |
| r(O <sub>1</sub> –O <sub>4</sub> )                          | 2.3335636  | 2.3410944  |
| $\angle$ (O <sub>1</sub> –O <sub>4</sub> –Si <sub>2</sub> ) | 46.2315078 | 46.2095086 |
| $\angle$ (O <sub>1</sub> –O <sub>4</sub> –Si <sub>3</sub> ) | 46.2315078 | 46.2088869 |

Table S123: c-<sup>28</sup>Si<sup>30</sup>Si<sup>16</sup>O<sup>16</sup>O Fermi Resonances

$$2\nu_6=\nu_5$$
